# Supplementary material for: Cell-density independent increased lymphocyte production and loss rates post-autologous HSCT
Source: eLife. 2021 Feb 4;10:e59775. doi: 10.7554/eLife.59775 (PMC7886352; doi:10.7554/eLife.59775)
Supplement: Figure 4—source data 1. [file elife-59775-fig4-data1.xlsx]

## Sheet: Blad1
	Figure 4-source data 1. Estimates for urine and granulocytes parameters and their corresponding 95% confidence limits for deuterium enrichment.
			Estimated parameter
			(95% confidence limits)
	Patient	f	δ	S0	c	p granulocytes
	A	0.019	0.1269	0.0079	4.04	0.0884
		(0.0190-0.0193)	(0.1256-0.1293)	(0.0079-0.0085)	(4.03-4.17)	(0.0758-0.0884)
	B	0.0103	0.091	0.0027	8.55	0.0889
		(0.0097-0.0109)	(0.0749-0.1142)	(0.0017-0.0036)	(7.79-9.66)	(0.0635-0.1222)
	C	0.0188	0.0787	0.0053	5.72	0.0903
		(0.0185-0.0192)	(0.0749-0.0059)	(0.0049-0.0059)	(5.54-5.99)	(0.0717-0.1042)
	D	0.0216	0.0749	0.0069	5.04	0.0891
		(0.0210-0.0219)	(0.0701-0.0789)	(0.0062-0.0077)	(4.85-5.34)	(0.07152-0.1015)
	E	0.0304	0.0868	0.0089	3.76	0.0936
		(0.0304-0.0309)	(0.0812-0.0881)	(0.0088-0.0097)	(3.69-3.83)	(0.0851-0.967)
	F	0.017	0.0834	0.0036	5.71	0.0823
		(0.0166-0.0176)	(0.0746-0.0923)	(0.0028-0.0049)	(5.13-6.16)	(0.0634-0.1088)
	f: fraction of 2H2O in drinking water; δ: body water turnover rate per day; S0: fraction of 2H2O in urine at time 0; c: amplification factor that needs to be introduced because the adenosine dR moiety contains multiple hydrogen atoms that can be replaced by deuterium 52; p granulocytes: average turnover rate of granulocytes per day.
