# Supplementary material for: Cell-density independent increased lymphocyte production and loss rates post-autologous HSCT
Source: eLife. 2021 Feb 4;10:e59775. doi: 10.7554/eLife.59775 (PMC7886352; doi:10.7554/eLife.59775)
Supplement: Figure 4—source data 2. [file elife-59775-fig4-data2.xlsx]

## Sheet: Blad1
		Figure 4-source data 2. Estimates of average daily production rates for T-cell subsets of autoHSCT patients.
			Average production rate per day
			(95% confidence limits)
	Patient	Naive CD4+	Naive CD8+	Memory CD4+	Memory CD4+
		T-cells	T-cells	T-cells	T-cells
	A	0.0032	0.0077	0.0199	0.0257
		(0.0031-0.0047)	(0.0071-0.0115)	(0.0185-0.0224)	(0.0225-0.0446)
	B	0.0054	0.0045	0.0549	0.0067
		(0.0051-0.0067)	(0.0039-0.0058)	(0.0262-0.4071)	(0.0049-0.0141)
	C	0.0032	0.0045	0.0289	0.0521
		(0.0029-0.0036)	(0.0041-0.0048)	(0.0173-0.0736)	(0.0235-0.2026)
	D	0.0038	0.0048	0.0134	0.0366
		(0.0036-0.0047)	(0.0045-0.0053)	(0.0127-0.0145)	(0.0032-0.0054)
	E	0.003	0.0036	0.0124	0.0245
		(0.0024-0.0036)	(0.0036-0.0043)	(0.0108-0.0139)	(0.0023-0.0026)
	F	0.0024	0.0022	0.0108	0.0399
		(0.0023-0.0026)	(0.0019-0.0025)	(0.0090-0.0140)	(0.0063-0.1689)
