# Supplementary material for: Cell-density independent increased lymphocyte production and loss rates post-autologous HSCT
Source: eLife. 2021 Feb 4;10:e59775. doi: 10.7554/eLife.59775 (PMC7886352; doi:10.7554/eLife.59775)
Supplement: Figure 8—source data 1. [file elife-59775-fig8-data1.xlsx]

## Sheet: Blad1
	Figure 8-source data file 1. Estimates of average daily loss rates for B- and T-cell subsets of autoHSCT patients.
				Average loss rate per day
				(95% confidence limits)
	Patient	Naive	Ig class-switched memory	IgM+ memory	Naive CD4+	Naive CD8+	Memory CD4+	Memory CD4+
		B-cells	B-cells	B-cells	T-cells	T-cells	T-cells	T-cells
	A	0.0067	0.019	0.0165	0.0025	0.0071	0.0191	0.0252
		(0.0056-0.0096)	(0.0173-0.0207)	(0.0057-0.0129)	(0.0024-0.0041)	(0.0051-0.0116)	(0.0177-0.0219)	(0.0210-0.0432)
	B	0	0.0664	0.037	0	0.0051	0.0541	0.0101
		(0.0000-0.0333)	(0.0448-0.1509)	(0.0071-0.0506)	(0.0000-0.0021)	(0.0004-0.0096)	(0.0249-0.4071)	(0.0059-0.0189)
	C	0.0164	0.1342	n.a.	0.0022	0.0048	0.0296	0.0528
		(0.0144-0.0265)	(0.0946-0.2716)		(0.0005-0.0040)	(0.0026-0.0073)	(0.0182-0.0739)	(0.0242-0.2036)
	D	0.0073	0.0305	0.0131	0.005	0.0044	0.0151	0.0058
		(0.0054-0.0119)	(0.0242-0.0424)	(0.0067-0.0179)	(0.0034-0.0068)	(0.0027-0.0168)	(0.0138-0.0167)	(0.0043-0.0089)
	E	0.0503	0.0333	0.0862	0.0011	0.0039	0.0109	0.0331
		(0.0041-0.0072)	(0.0289-0.0421)	(0.0086-0.0599)	(0.0001-0.0020)	(0.0034-0.0053)	(0.0091-0.0127)	(0.0020-0.0049)
	F	0.0113	0.0402	0.0209	0.0039	0.0056	0.0134	0.0436
		(0.0086-0.0176)	(0.0371-0.0449)	(0.0067-0.0337)	(0.0025-0.0057)	(0.0019-0.0092)	(0.0107-0.0172)	(0.0112-0.1738)
