# Supplementary material for: Cell-density independent increased lymphocyte production and loss rates post-autologous HSCT
Source: eLife journal article supplement (doi:10.7554/elife.59775), 2021-02-03
Supplement: supp [file elife-59775-supp-v1.zip]

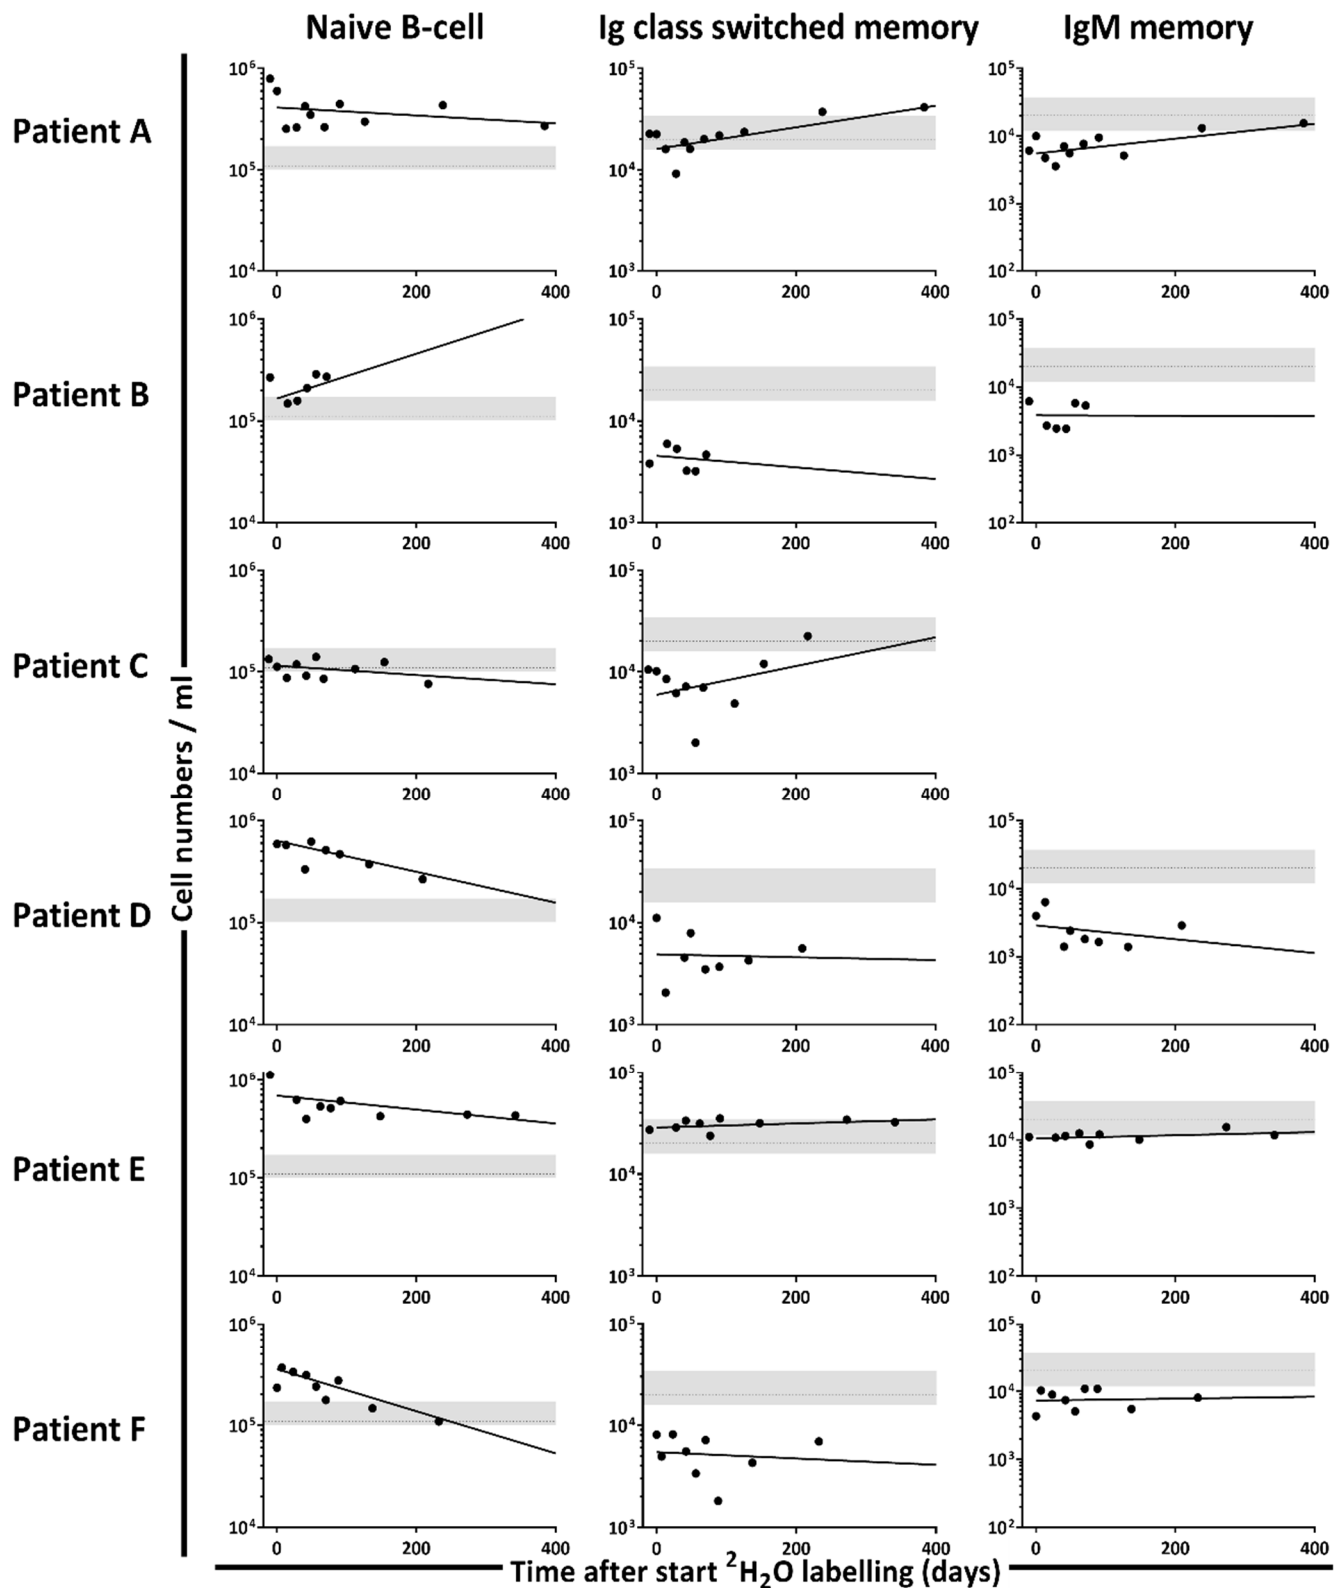

**Figure 8-figure supplement 2. Best fits of B-cell numbers in autoHSCt patients.** Best fits (black lines) to the normalized cell number data (black dots). Absolute numbers (cells per milliliter of blood) of naive ( $\text{CD}19^+\text{IgM}^+\text{CD}27^-$ ), Ig class-switched memory ( $\text{CD}19^+\text{IgM}^-\text{CD}27^+$ ) and IgM<sup>+</sup> memory ( $\text{CD}19^+\text{IgM}^+\text{CD}27^+$ ) B-cells were corrected for noise as described material and methods. The median cell numbers (dotted grey line) and the corresponding IQR (interquartile range, grey area) for healthy controls are shown.
