# Supplementary material for: Cell-density independent increased lymphocyte production and loss rates post-autologous HSCT
Source: eLife journal article supplement (doi:10.7554/elife.59775), 2021-02-03
Supplement: supp [file elife-59775-supp-v1.zip]

## Ki67 T-cells

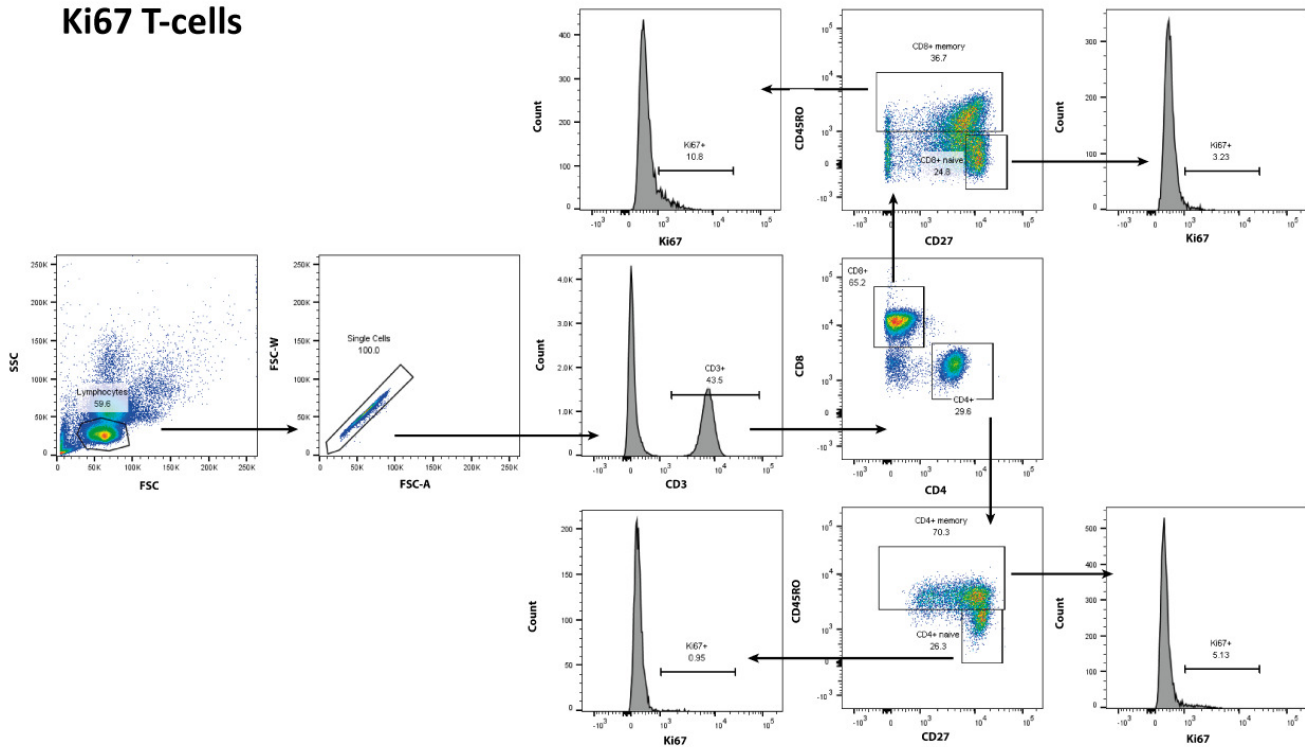

## Ki67 B-cells

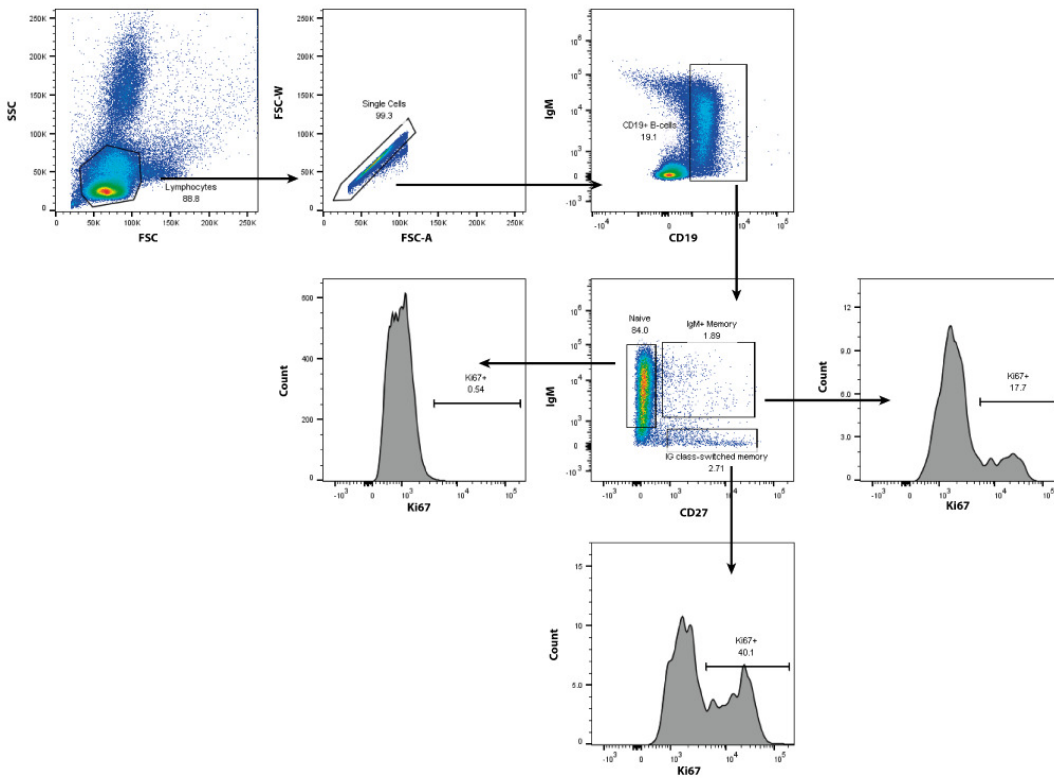

**Figure 5-figure supplement 1. Gating strategy for Ki-67 expression of T and B cell subsets.** Gating strategy for Ki-67 expression of naive (CD27<sup>+</sup>CD45RO<sup>-</sup>) and memory (CD45RO<sup>+</sup>) CD4<sup>+</sup> and CD8<sup>+</sup> T-cells and naive (IgM<sup>+</sup>CD27<sup>-</sup>), Ig class-switched memory (IgM<sup>+</sup>CD27<sup>+</sup>) and IgM<sup>+</sup> memory (IgM<sup>+</sup>CD27<sup>+</sup>) B-cells
