# Supplementary material for: Cell-density independent increased lymphocyte production and loss rates post-autologous HSCT
Source: eLife journal article supplement (doi:10.7554/elife.59775), 2021-02-03
Supplement: supp [file elife-59775-supp-v1.zip]

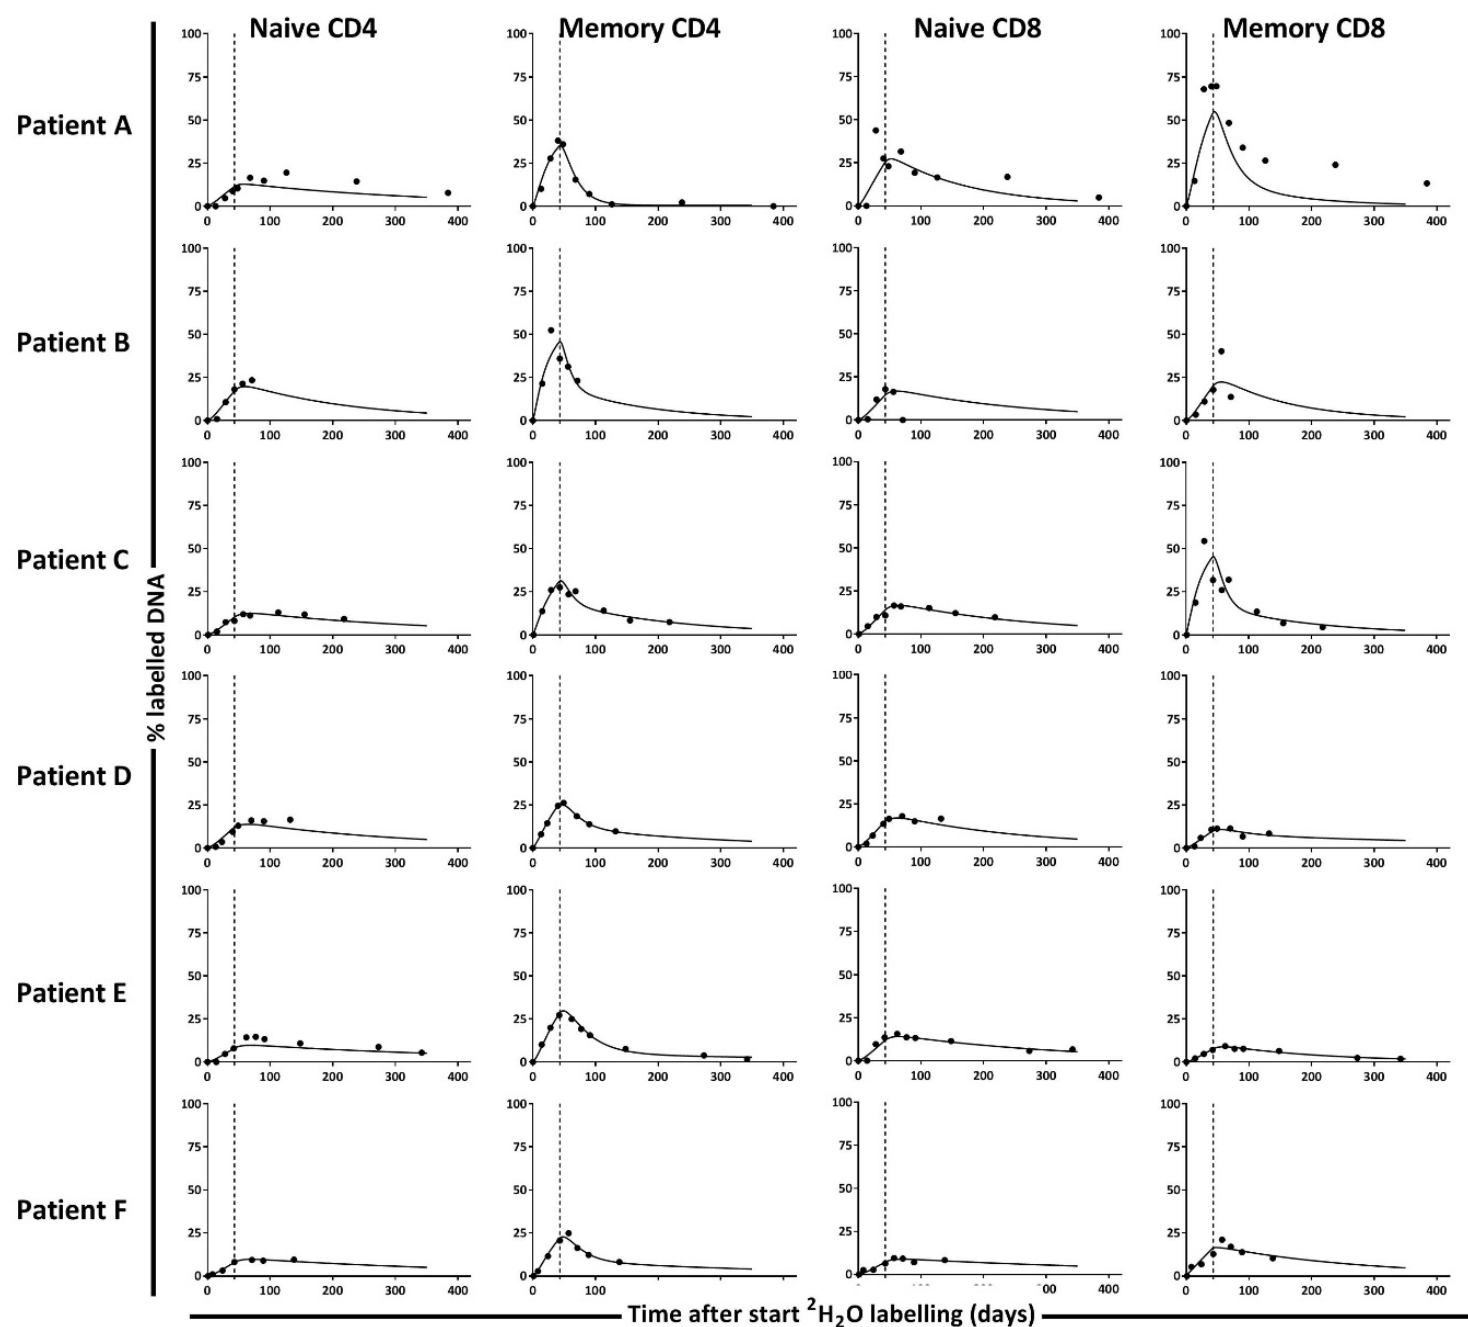

**Figure 4-figure supplement 2. Best fits of  $^2\text{H}$  enrichment in T-cell subsets in autoHSCT patients.** Best fits of the model (see material and methods) to the enrichment data in naive and memory  $\text{CD4}^+$  and  $\text{CD8}^+$  T cells in the 6 autoHSCT patients (A to F). Measured enrichments are shown by black dots. Label enrichment in the DNA was scaled between 0 and 100% by normalizing for the maximum enrichment in granulocytes (see material and methods). The end of  $^2\text{H}_2\text{O}$  administration is marked by a dashed vertical line. Best fits of  $^2\text{H}$  enrichment of the corresponding subsets in healthy individuals were previously published by Westera *et al.* 2015 <sup>24</sup>.
