# Supplementary material for: Cell-density independent increased lymphocyte production and loss rates post-autologous HSCT
Source: eLife journal article supplement (doi:10.7554/elife.59775), 2021-02-03
Supplement: supp [file elife-59775-supp-v1.zip]

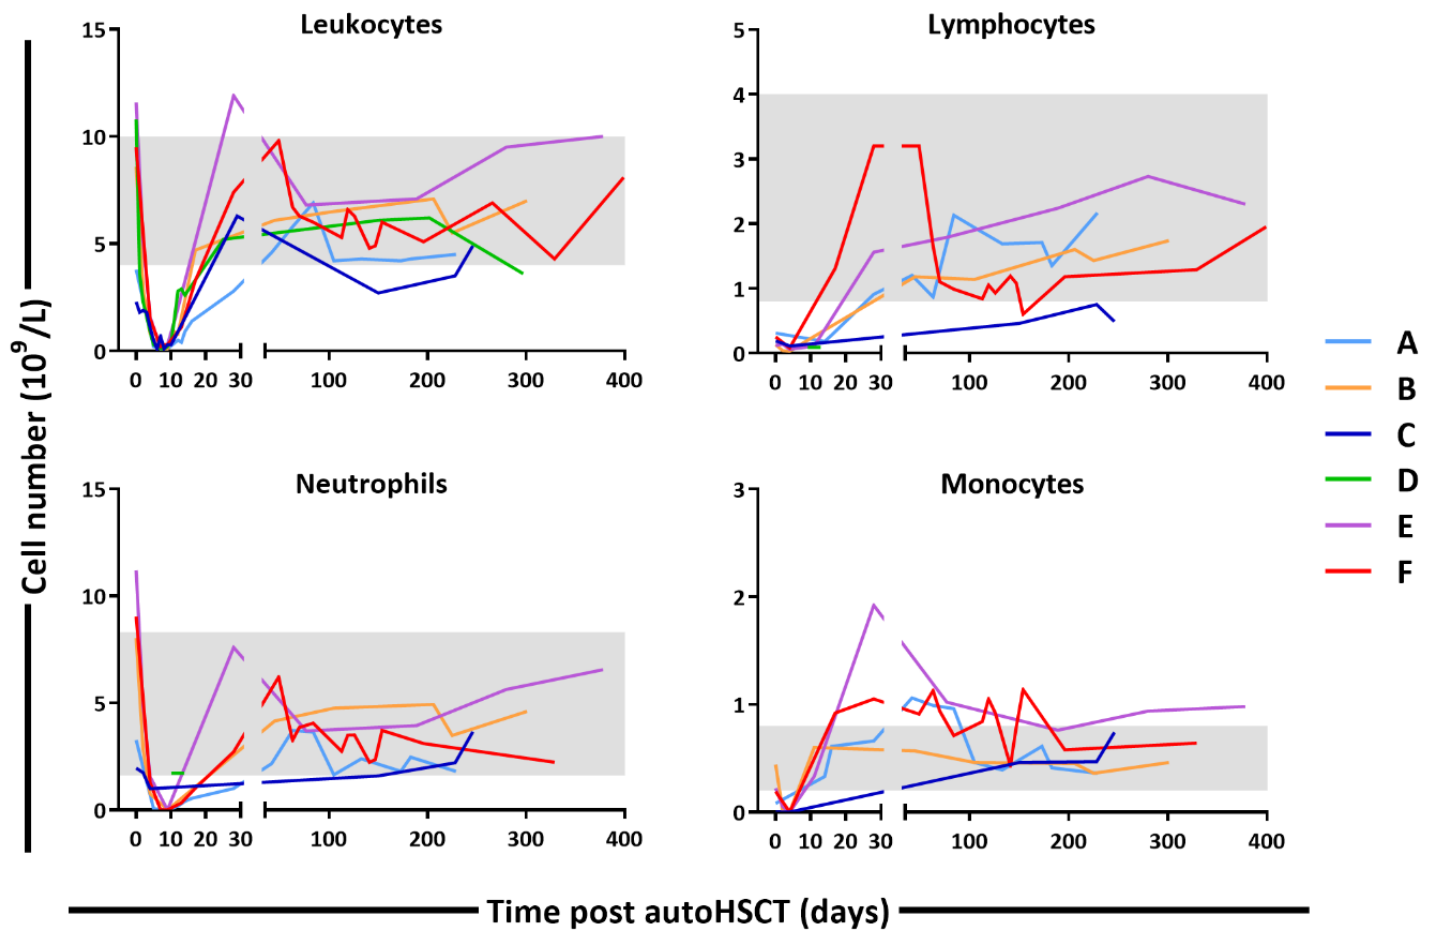

**Figure 1-figure supplement 1.** Absolute numbers (cells $\times 10^9$  per liter of blood) of leukocytes, neutrophils, lymphocytes and monocytes in peripheral blood of autoHSCT patients (patients A to F) over time after autoHSCT obtained by automated blood leukocyte differential count (leukodiff). Grey areas show the range of healthy individuals' values
