# Supplementary material for: Cell-density independent increased lymphocyte production and loss rates post-autologous HSCT
Source: eLife journal article supplement (doi:10.7554/elife.59775), 2021-02-03
Supplement: supp [file elife-59775-supp-v1.zip]

## A Body water

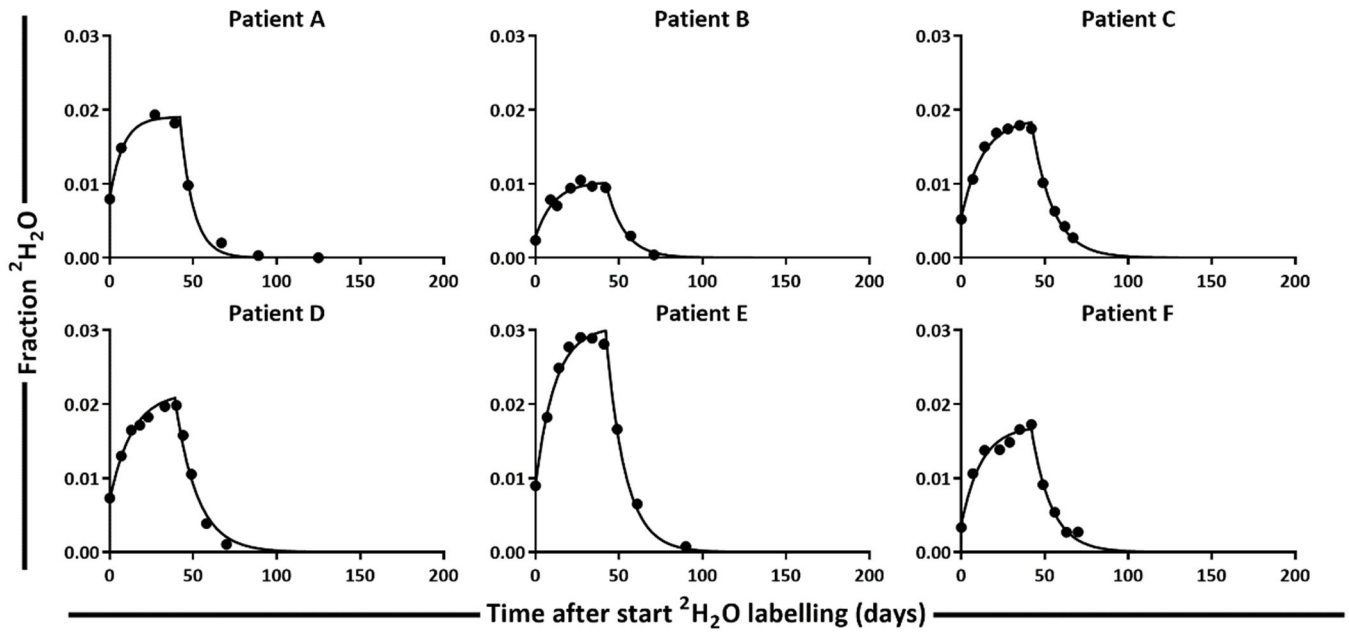

## B Granulocytes

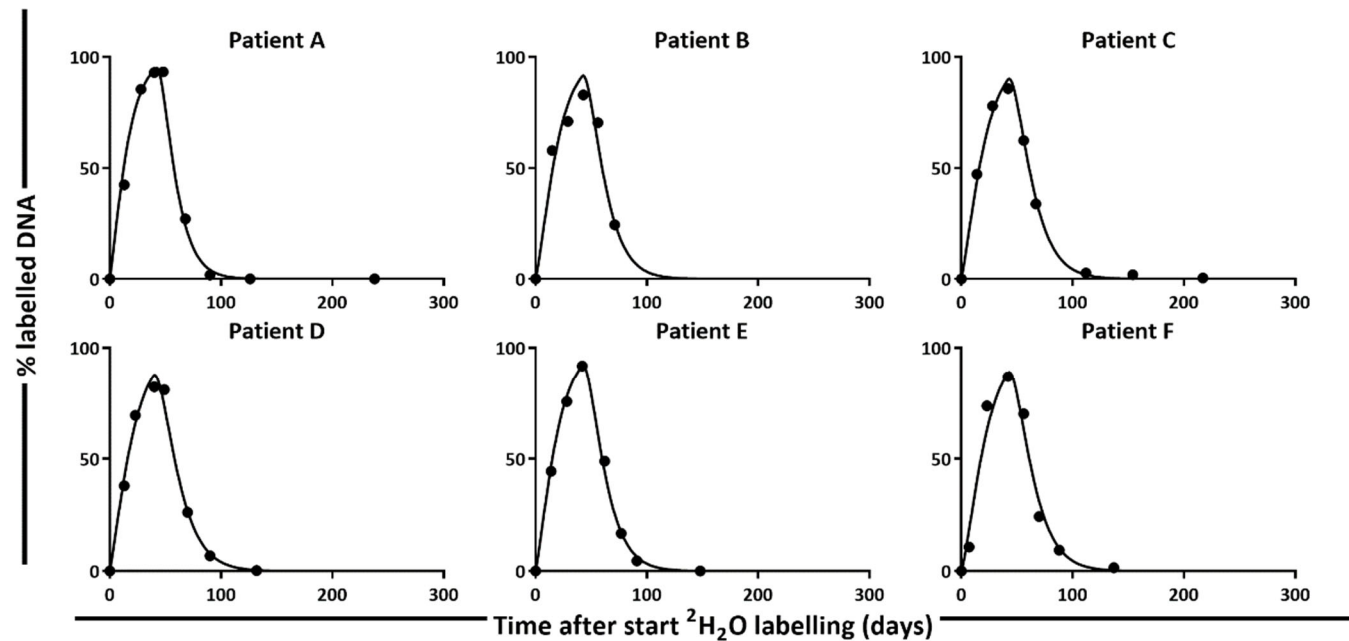

**Figure4-figure supplement 1.** Best fits of  $^2\text{H}$  enrichment in (A) body water (urine) and (B) granulocytes from the 6 autoHSCT patients (A to F). The estimated parameters for urine and granulocytes can be found in Figure 4-source data 2: Parameter estimates urine and granulocytes.
