# Supplementary material for: Cell-density independent increased lymphocyte production and loss rates post-autologous HSCT
Source: eLife journal article supplement (doi:10.7554/elife.59775), 2021-02-03
Supplement: supp [file elife-59775-supp-v1.zip]

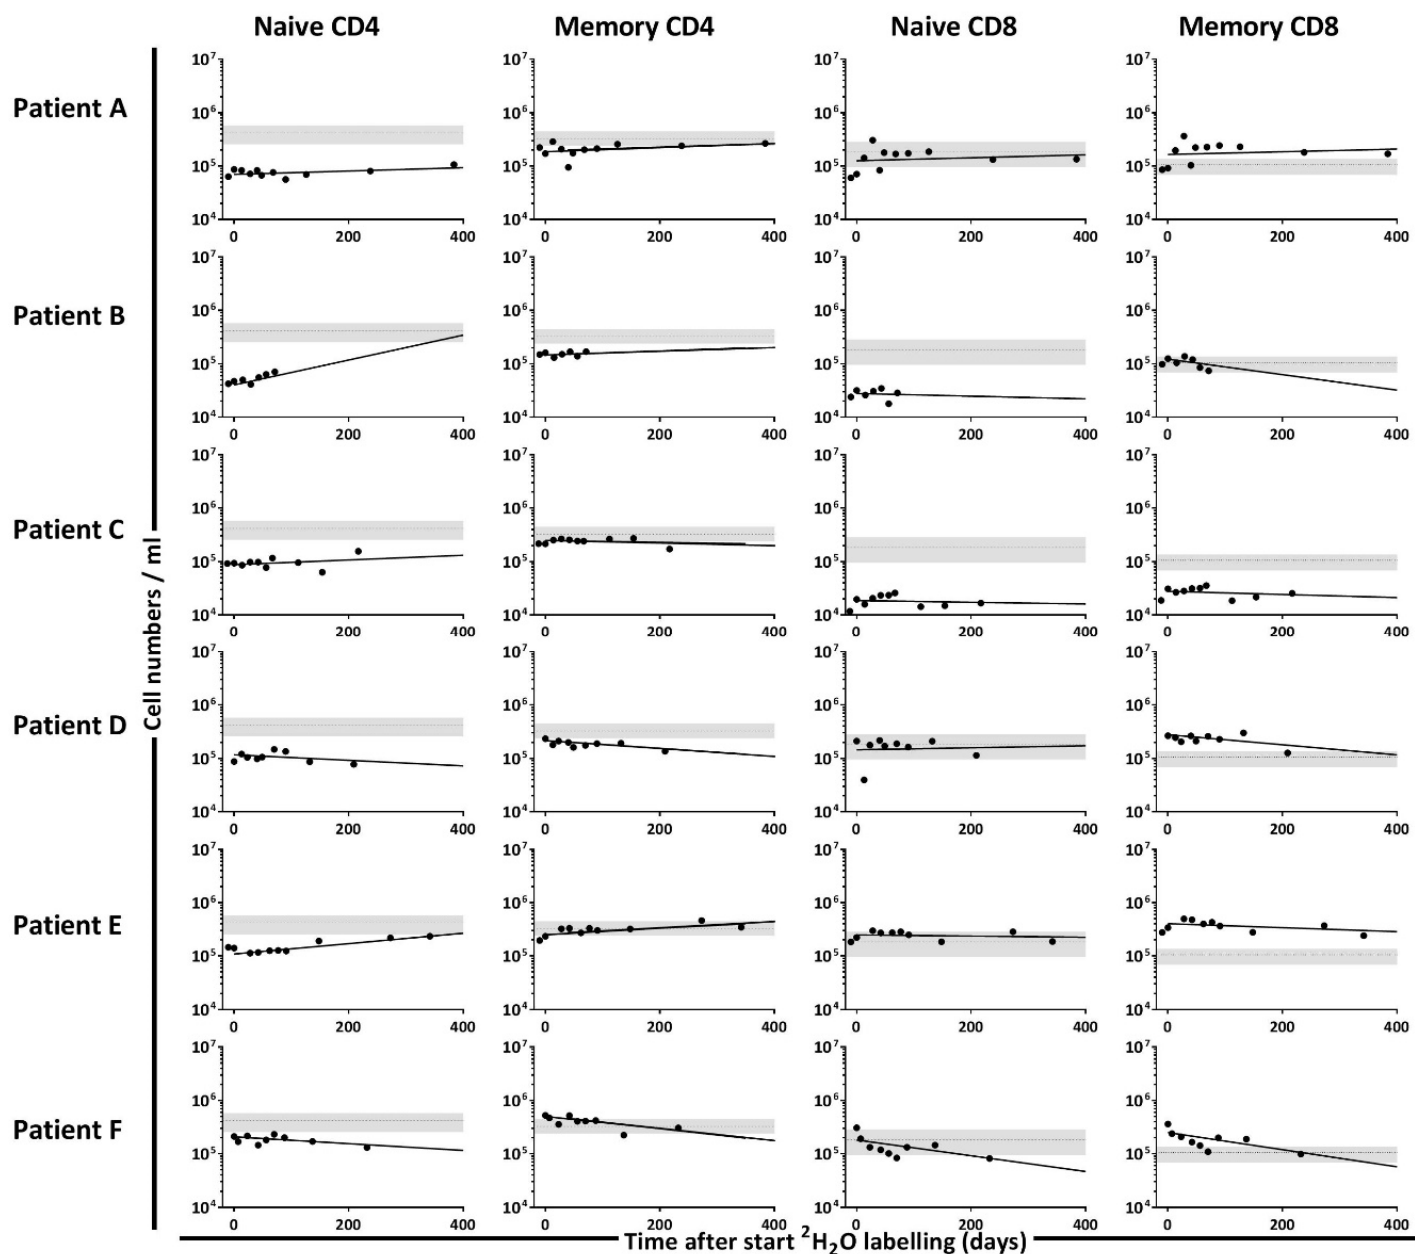

**Figure 8-figure supplement 1. Best fits of T-cell numbers in autoHSCT patients.** Best fits (black lines) to the normalized cell numbers data (black dots). Absolute numbers (cells per milliliter of blood) of naive ( $CD27^+CD45RO^-$ ) and memory ( $CD45RO^+$ )  $CD4^+$  and  $CD8^+$  T-cells were corrected for noise as described in material and methods. The median cell numbers (dotted grey line) and the corresponding IQR (interquartile range, grey area) for healthy controls are shown.
