# Supplementary material for: Cell-density independent increased lymphocyte production and loss rates post-autologous HSCT
Source: eLife journal article supplement (doi:10.7554/elife.59775), 2021-02-03
Supplement: supp [file elife-59775-supp-v1.zip]

Archive with 21 entries (21 files):
- elife_poa_e59775_Figure_1_figure_supplement_1.pdf
- elife_poa_e59775_Figure_3_figure_supplement_1.tif
- elife_poa_e59775_Figure_3_figure_supplement_2.pdf
- elife_poa_e59775_Figure_3_figure_supplement_3.pdf
- elife_poa_e59775_Figure_4_figure_supplement_1.pdf
- elife_poa_e59775_Figure_4_figure_supplement_2.pdf
- elife_poa_e59775_Figure_5_figure_supplement_1.pdf
- elife_poa_e59775_Figure_5_figure_supplement_2.tif
- elife_poa_e59775_Figure_6_figure_supplement_1.tif
- elife_poa_e59775_Figure_7_figure_supplement_1.pdf
- elife_poa_e59775_Figure_8_figure_supplement_1.pdf
- elife_poa_e59775_Figure_8_figure_supplement_2.pdf
- elife_poa_e59775_Figure_2_source_data_1.xls
- elife_poa_e59775_Figure_3_source_data_1.xls
- elife_poa_e59775_Figure_4_source_code_1.xls
- elife_poa_e59775_Figure_4_source_data_1.xlsx
- elife_poa_e59775_Figure_4_source_data_2.xlsx
- elife_poa_e59775_Figure_6_source_data_1.xls
- elife_poa_e59775_Figure_7_source_data_1.xlsx
- elife_poa_e59775_Figure_8_source_data_1.xlsx
- elife_poa_e59775_Transparent_Reporting_File.docx
