# Supplementary material for: Cell-density independent increased lymphocyte production and loss rates post-autologous HSCT
Source: eLife journal article supplement (doi:10.7554/elife.59775), 2021-02-03
Supplement: supp [file elife-59775-supp-v1.zip › elife_poa_e59775_Figure_2_source_data_1.xls]

## Sheet: Obs Conc
Figure 2-source data: Luminex data for different plasma markers, time points and patients
individual	IL-7	IL-15	APRIL	IL-8	FAS-L	CRP
L01-1	62.56	12.91	166.33	52.31	69.38	3632800
L01-2	47.27	15.52	771.41	2775.07	87.33	7129000
L01-3	17.08	11.2	193.27	41.8	70.05	3134700
L02-1	1.3	8.88	125.9	212.72	88.89	7854400
L02-2	1.3	9.16	329.31	308.14	82.13	33068000
L02-3	1.3	6.25	75.15	16.23	58.84	2756500
L03-1	1.3	7.71	194.11	124.31	65.21	4700100
L03-2	14.71	8.85	303	13.87	67.28	7999100
L03-4	39.94	14.49	163.39	22.87	71.96	4582900
L04-1	1.3	5.44	110.2	11.45	53.04	3413500
L04-2	1.3	4.15	87.88	5.04	47.58	4436500
L04-3	1.3	7.39	85.15	8.66	59.62	7613000
E01-1	1.3	8.26	154.03	6.36	69.63	4641300
E01-2	1.3	7.76	155.42	18.93	74.26	26596000
E02-1	1.3	6.2	82.04	5.02	59.82	786601
E02-2	1.3	6.81	142.77	9.44	90.79	1204400
E02-3	1.3	6.57	74.86	2.25	81.77	982020
E02-4	1.3	5.74	74.53	2.25	81.94	3749000
control 1	37.91	22.4	386.39	41.83	62.57	2602600
control 2	153.05	51.16	122.96	113.45	48.46	4973800
control 3	1.3	13.82	243.54	37.85	28.8	6617700
control 4	1.3	16.11	403.74	41.95	8.5	5539100
control 5	1.3	13.16	263.92	30.32	8.5	5514600
control 6	6.75	27.25	64.05	7.53	8.5	17561000
control 7	691.67	189.89	135.3	913.14	38.95	1880700
control 8	391.01	148.34	330.94	508.25	96.86	1920800
control 9	417.49	110.24	193.21	346.18	38.92	13789000
control 10	1.3	7.29	269.74	28.06	39.83	6982000
control 11	1.3	7.5	409.63	73.15	99.19	3711600
control 12	469.87	311.32	329.3	420.51	65.81	4433000
control 13	1.3	12.41	342.7	6.59	59.35	4217800
control 14	27.48	18.98	449.15	144.13	50.12	15079000
control 15	209.15	90	208.9	190.25	8.5	2929800
control 16	1.3	6.49	71.66	2.25	8.5	5369100
control 17	23.63	21.67	208.58	21.2	82.73	1562500
control 18	35.42	14.91	80.16	23.26	80.36	13982000
control 19	1.3	11.58	113.94	2.25	8.5	528292
control 20	20.37	11.96	190.69	7.19	54.72	15195000
control 21	1.3	19.86	404.85	7.04	433.4	742602
control 22	81.35	20.43	68.6	38.41	55.48	1444000
control 23	7.91	6.6	127.88	13.14	37.5	1389000
control 24	113.81	20.36	392.12	126.47	105.71	1060300
control 25	568.71	187.84	279.1	270.56	67.18	559310
control 26	1.3	5.74	67.38	11.5	54.16	8275000
control 27	1.37	5.63	463.32	42.28	66.46	28420000
control 28	13.21	7.94	95.52	16.21	60.47	10653000
control 29	113.22	34.11	153.78	71.11	119.63	997428
