# Supplementary material for: Cell-density independent increased lymphocyte production and loss rates post-autologous HSCT
Source: eLife journal article supplement (doi:10.7554/elife.59775), 2021-02-03
Supplement: supp [file elife-59775-supp-v1.zip › elife_poa_e59775_Figure_3_figure_supplement_2.pdf]

## A TruCount

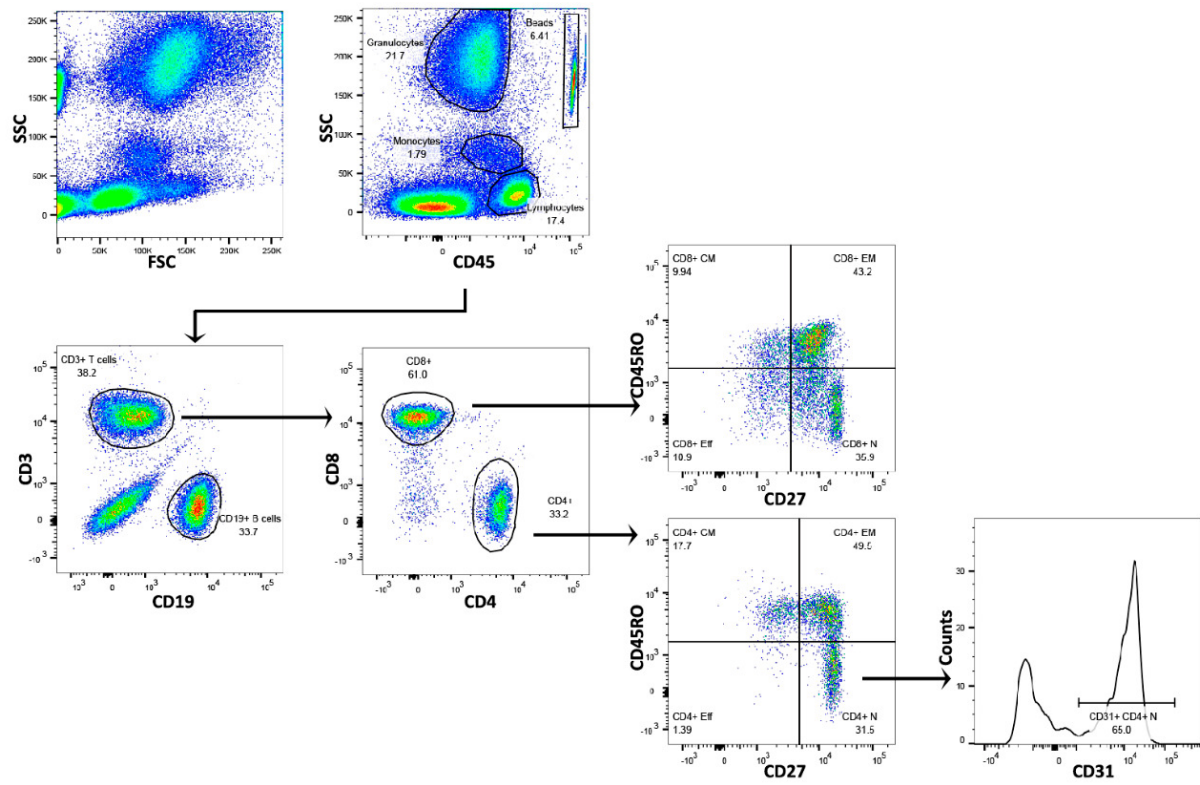

## B Sorting strategy

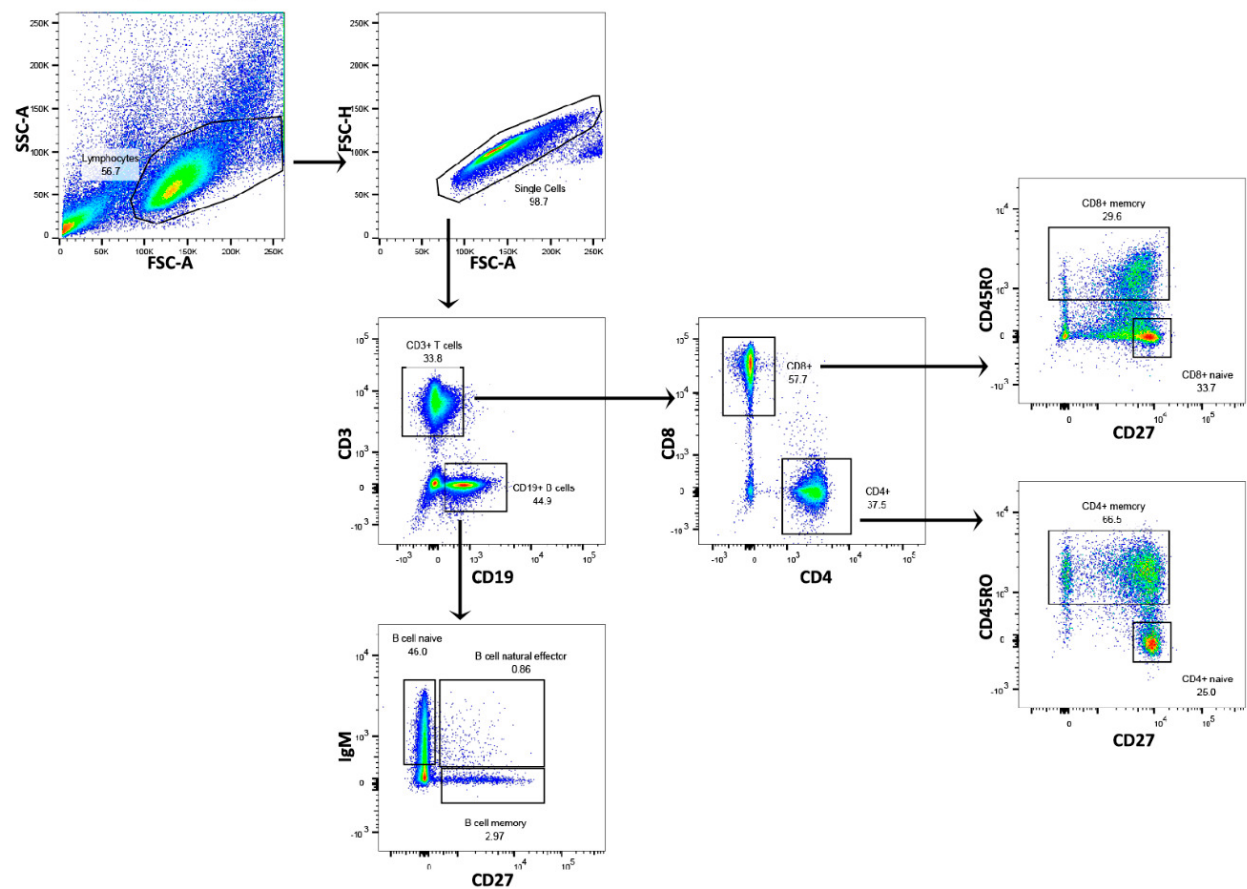

**Figure 3-figure supplement 2. Gating strategy for TruCount and cell sorting. (A)** TruCount gating strategy for naive ( $CD27^+CD45RO^-$ ), central memory (CM,  $CD27^+CD45RO^+$ ), effector memory (EM,  $CD27^+CD45RO^+$ ) and effector ( $CD27^-CD45RO^-$ )  $CD4^+$  and  $CD8^+$  T-cells and B-cells. **(B)** Gating strategy for sorting for naive ( $CD27^+CD45RO^-$ ) and memory ( $CD45RO^+$ )  $CD4^+$  and  $CD8^+$  T-cells and for naive ( $IgM^+CD27^-$ ), Ig class-switched memory ( $IgM^-CD27^+$ ) and  $IgM^+$  memory ( $IgM^+CD27^+$ ) B-cells.
