# Supplementary material for: Cell-density independent increased lymphocyte production and loss rates post-autologous HSCT
Source: eLife journal article supplement (doi:10.7554/elife.59775), 2021-02-03
Supplement: supp [file elife-59775-supp-v1.zip › elife_poa_e59775_Figure_3_figure_supplement_3.pdf]

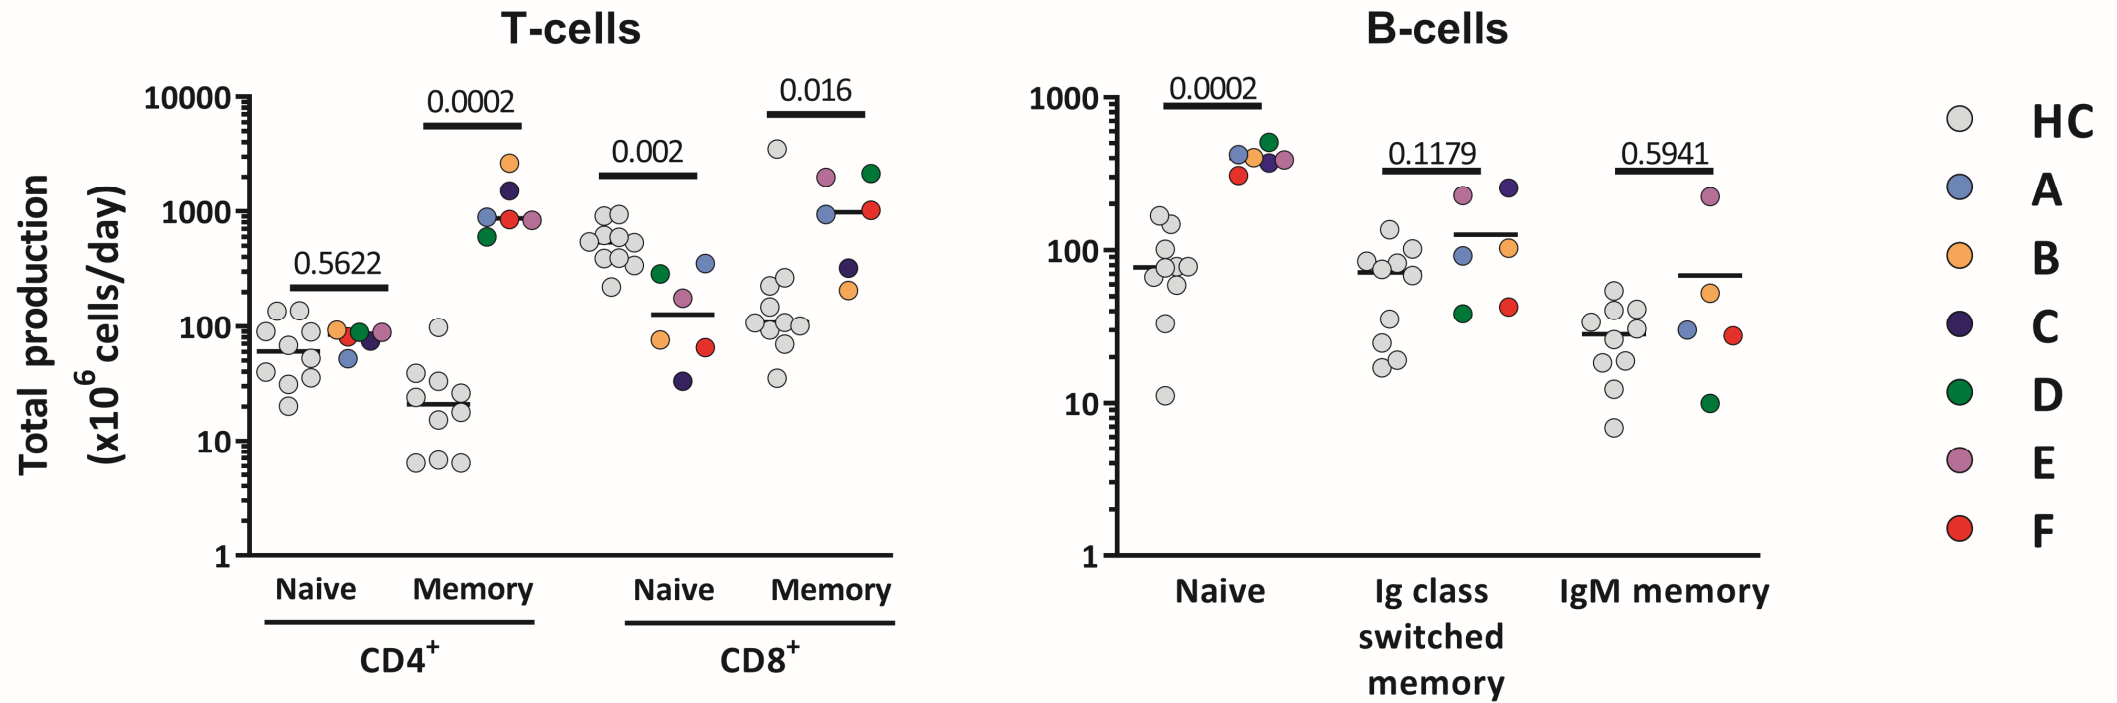

**Figure 4-figure supplement 3.** Total daily production T-cell and B-cell subsets, calculated as  $(\sigma/N + p_{-}(N)) \times (\text{absolute number of cells per liter of blood}) \times (5 \text{ liter blood}) \times 50$ , assuming that 2% of lymphocytes reside in the blood<sup>34</sup>. Horizontal lines represent median values. P-values of differences between groups are shown (Mann-Whitney test).
