# Supplementary material for: Cell-density independent increased lymphocyte production and loss rates post-autologous HSCT
Source: eLife journal article supplement (doi:10.7554/elife.59775), 2021-02-03
Supplement: supp [file elife-59775-supp-v1.zip › elife_poa_e59775_Figure_3_source_data_1.xls]

## Sheet: controls
Figure 3-source data 1: Blood values T cell numbers and percentages of healthy controls.
number per ml	total	total	total	naïve	memory	naïve	memory	ratio
subset	CD3	CD4	CD8	CD4N	CD4M	CD8N	CD8M	CD4/CD8
control 1	1340000	831000	352000	581000	241000	265000	47800	2.35227
control 2	1260000	740000	437000	291000	441000	205000	76500	1.69164
control 3	2180000	1270000	534000	916000	326000	342000	106000	2.37551
control 4	428000	317000	89800	100000	216000	28400	43100	3.51905
control 5	845000	543000	257000	253000	287000	119000	104000	2.11184
control 6	1540000	1220000	262000	771000	446000	168000	80500	4.66471
control 7	1300000	958000	291000	567000	385000	135000	113000	3.29148
control 8	1890000	1030000	717000	439000	559000	252000	126000	1.43158
control 9	1480000	876000	541000	640000	233000	448000	68700	1.61853
control 10	1120000	589000	439000	231000	355000	162000	137000	1.34359
control 11	745000	229000	376000	157000	70400	126000	101000	0.607921
control 12	1550000	973000	453000	694000	270000	350000	68800	2.14384
control 13	1680000	729000	675000	391000	318000	311000	113000	0.331671
control 14	1580000	699000	826000	245000	451000	242000	287000	0.846449
control 15	2060000	1.07828e+06	739000	553000	640000	330000	325000	1.45961
control 16	1410000	941650	335000	475000	465000	116000	143000	2.81435
control 17	811000	500074	169000	257000	239000	95700	55200	2.95215
control 18				534000	188000	253800	164500
control 19				469200	113600	241400	60350
control 20				307100	270000	185000	90000
control 21				897000	136400	286000	52800
control 22				897600	254200	483800	164000
control 23				350000	340000	54000	110000
control 24				340000	350000	31000	55000
control 25				190000	490000	28000	130000
control 26				420000	470000	49000	150000
control 27				280000	550000	21000	110000
Median	1410000	831000	437000	420000	326000	185000	106000	2.112
Lower 95% confidence limit	1120000	589000	291000	280000	241000	116000	68800	1.432
Upper 95% confidence limit	1580000	973000	541000	567000	446000	265000	130000	2.814
percentages
	CD4N	CD4CM	CD4EM	CD4effector		CD8N	CD8CM	CD8EM
control 1	70	23.2	5.9	1		75.3	8.9	4.6
control 2	39.3	49.7	9.9	1.1		46.8	9.7	7.8
control 3	72.3	21.2	4.5	2		64	18.1	1.6
control 4	31.6	60	8.3	0.1		31.6	33.5	14.5
control 5	46.7	42.2	10.7	0.4		46.3	37.7	2.8
control 6	63.2	32.9	3.7	0.3		64.3	25.2	5.6
control 7							29.4	9.3
control 8
control 9
control 10
Median	59.1	32.9	8.3	0.6		46.2	25.2	5.6

## Sheet: participants
Figure 3-source data 1: Blood values of T cell numbers and percetages of participants
Pat	ID in paper
E02	A
E01	B
L01	C
L03	D
L04	E
L02	F
Pat	ID	Time after start treatment	naïve CD4	memory CD4	naïve CD8	memory CD8
L01	1	275	91783.9	217179	11765.5	18800.5
L01	1	287	93685.4	215540	19632.8	30959.4
L01	1	301	85678	253925	15929	26701.1
L01	1	315	98225.5	266451	20551.6	28185
L01	1	329	97976.2	256915	23321.6	31433.5
L01	1	343	77409.9	243988	23540.4	31938.6
L01	1	354	116311	242345	25873.6	35540.6
L01	1	399	95979	265703	14341.4	18550.2
L01	1	441	63135	273246	14886.4	21639
L01	1	504	156095	172731	16778.4	25465.7
L02	2	399	211940	525702	307547	362122
L02	2	427	169374	471500	191891	239266
L02	2	440	216470	357594	133031	208466
L02	2	462	145755	519972	119347	166377
L02	2	476	182518	409415	102207	143443
L02	2	490	232523	412050	83985	110230
L02	2	508	201411	420782	132733	199727
L02	2	557	170894	224102	145438	189206
L02	2	652	131647	306289	81981.2	99081.6
L03	3	355	87529.5	233523	210560	264566
L03	3	368	120387	179001	39501.5	244416
L03	3	378	104130	210905	176963	204534
L03	3	395	98123.4	199392	216469	263597
L03	3	404	105656	160430	170790	210463
L03	3	425	147602	174819	187927	259571
L03	3	445	135593	189338	162898	228394
L03	3	487	86320.4	191725	210096	299970
L03	3	564	77318.1	135817	114063	126518
E01	4	225	42444.3	150036	24039.7	98708.3
E01	4	245	47354.5	161600	31808	125304
E01	4	260	50280	131775	26074	105098
E01	4	274	41283.4	151373	30787.4	138773
E01	4	288	55910	169116	34725.2	120910
E01	4	301	63664.8	139228	17930.9	85171.9
E01	4	316	71166.3	170601	28655.2	74185.1
E02	5	183	63813	222610	60533.9	85690.8
E02	5	196	86659.7	172240	71169.3	92225.3
E02	5	209	83562.6	288121	142725	196925
E02	5	224	71857.4	207781	305611	366213
E02	5	236	83550.3	95347.9	84098.4	103886
E02	5	244	67329.6	175405	179571	223171
E02	5	264	76351.6	203019	169816	227080
E02	5	286	56296.8	213493	174100	243859
E02	5	322	69834.8	257269	187125	231315
E02	5	464	80838.6	240886	132950	180960
E02	5	593	107143	266153	135582	170142
L04	6	378	146510	197169	184470	277363
L04	6	414	141765	234442	222885	342462
L04	6	442	113638	325318	299197	499776
L04	6	456	117008	332283	272339	480694
L04	6	476	126443	273150	274829	400548
L04	6	491	127635	332880	285943	431245
L04	6	505	125150	303565	249883	365618
L04	6	562	191984	323539	185810	279736
L04	6	682	219880	464270	286049	372579
L04	6	756	235214	347449	187869	242578
