# Supplementary material for: Cell-density independent increased lymphocyte production and loss rates post-autologous HSCT
Source: eLife journal article supplement (doi:10.7554/elife.59775), 2021-02-03
Supplement: supp [file elife-59775-supp-v1.zip › elife_poa_e59775_Figure_4_source_code_1.xls]

## Sheet: Urine
Figure 4 and 7-source code and data 1: Urine enrichment
Pat	ID in paper
E02	A
E01	B
L01	C
L03	D
L04	E
L02	F
Pat	ID	time in study	Urine
L01	1	0	0.00521874
L01	1	7	0.0106015
L01	1	14	0.0150109
L01	1	21	0.0168536
L01	1	28	0.0174178
L01	1	35	0.0178967
L01	1	42	0.0174628
L01	1	49	0.0101441
L01	1	56	0.00629587
L01	1	62	0.00423315
L01	1	67	0.00271904
L02	2	0	0.00331932
L02	2	7	0.0106135
L02	2	14	0.0137422
L02	2	23	0.0138516
L02	2	29	0.0148444
L02	2	35	0.0165675
L02	2	42	0.0172566
L02	2	49	0.00910172
L02	2	56	0.00539823
L02	2	63	0.00269803
L02	2	70	0.00272727
L03	3	0	0.00729527
L03	3	7	0.0129754
L03	3	13	0.0164939
L03	3	18	0.017159
L03	3	23	0.018237
L03	3	33	0.0196804
L03	3	40	0.0198346
L03	3	44	0.0157659
L03	3	49	0.0105189
L03	3	58	0.00386124
L03	3	70	0.00104089
E01	4	0	0.0023669
E01	4	9	0.00785204
E01	4	13	0.00703992
E01	4	21	0.00941794
E01	4	27	0.0104837
E01	4	34	0.00968249
E01	4	42	0.00947588
E01	4	57	0.00293843
E01	4	71	0.000390165
E02	5	0	0.00794324
E02	5	7	0.0148348
E02	5	27	0.0193161
E02	5	39	0.01819
E02	5	47	0.00980421
E02	5	67	0.00200315
E02	5	89	0.000308143
E02	5	125	-1.64519e-05
L04	6	0	0.00896364
L04	6	7	0.0182045
L04	6	14	0.0248923
L04	6	20	0.0277177
L04	6	27	0.0290236
L04	6	34	0.0289077
L04	6	41	0.0281195
L04	6	49	0.0165929
L04	6	61	0.00651613
L04	6	90	0.0007539

## Sheet: APE
Figure 4 and 7-source code and data 1: DNA enrichment in different subsets.
Pat	ID in paper											Pat	ID in paper
E02	A											E02	A
E01	B											E01	B
L01	C											L01	C
L03	D											L03	D
L04	E											L04	E
L02	F											L02	F
		RAW APE												Normalised APE
name in modelling				N4_n	M4_n	N8_n	M8_n	NB_n	MB_n	NE_n		name in modelling				N4_n	M4_n	N8_n	M8_n	NB_n	MB_n
Pat	ID	time in study	granulos	naïve CD4	memory CD4	naïve CD8	memory CD8	naïve B	memory B (non IgM+) CD27+	memory B IgM+ CD27+		Pat	ID	time in study	granulos	naïve CD4	memory CD4	naïve CD8	memory CD8	naïve B	memory B (non IgM+) CD27+	memory B IgM+ CD27+
L01	1	0	0	0	0	0	0	0	0			L01	1	0	0	0	0	0	0	0	0
L01	1	14	0.0507596	0.00201625	0.00489461	0.0147598	0.020169	0.00998445	0.0476421			L01	1	14	47.2579	1.87716	4.55695	13.7416	18.7776	9.29566	44.3555
L01	1	28	0.0837438	0.00789893	0.0106187	0.0279694	0.0585021	0.0240714	0.070042			L01	1	28	77.9667	7.35401	9.88615	26.0399	54.4663	22.4108	65.2101
L01	1	42	0.092185	0.00870494	0.0115596	0.0296228	0.0341301	0.0316846	0.0727241			L01	1	42	85.8255	8.10442	10.7621	27.5792	31.7756	29.4988	67.7072
L01	1	56	0.0670576	0.0120562	0.0172337	0.0271721	0.0343843	0.0345911				L01	1	56	62.4316	11.2244	16.0448	25.2976	32.0123	32.2048	0
L01	1	67	0.0363521	0.0128126	0.017791	0.0252803	0.0278745	0.0308375	0.03299			L01	1	67	33.8443	11.9287	16.5636	23.5363	25.9516	28.7102	30.7142
L01	1	112	0.00284619	0.0139803	0.0163193	0.0151428	0.0144731	0.0195518	0.0100144			L01	1	112	2.64985	13.0159	15.1935	14.0982	13.4747	18.203	9.32353
L01	1	154	0.00201952	0.0127152	0.013113	0.009021	0.0072735					L01	1	154	1.8802	11.838	12.2084	8.39868	6.77173	0	0
L01	1	217	0.000499851	0.00997096	0.0105251	0.00798422	0.00480543	0.0110681	0.00379192			L01	1	217	0.465368	9.28311	9.79898	7.43342	4.47392	10.3046	3.53033
L02	2	0	0	0	0	0	0	0	0	0		L02	2	0
L02	2	7	0.010442	0.000926436	0.00250207	0.0027122	0.00519395	0.00240438	0.00904111	0.00408588		L02	2	7	9.72169	0.81013	2.18796	2.37171	4.5419	2.10253	7.90608	3.57293
L02	2	23	0.071607	0.00305492	0.0026259	0.0111915	0.00669956	0.00718223	0.031314	0.0249378		L02	2	23	66.6671	2.6714	2.29624	9.78655	5.85849	6.28057	27.3828	21.8071
L02	2	42	0.0844745	0.00784522	0.00618792	0.0200904	0.0124061	0.0147428	0.0511184	0.0393459		L02	2	42	78.6469	6.86033	5.41108	17.5683	10.8486	12.892	44.701	34.4064
L02	2	56	0.0681416		0.0091857	0.0241456	0.0204704	0.0228263	0.0400428	0.0321293		L02	2	56	63.4408	0	8.03252	21.1143	17.9006	19.9607	35.0158	28.0958
L02	2	70	0.0236395	0.00906626	0.00892797	0.0158037	0.0165354	0.0227149	0.0242062	0.025931		L02	2	70	22.0087	7.92807	7.80715	13.8197	14.4595	19.8632	21.1674	22.6756
L02	2	88	0.00905232	0.00863172	0.00684926	0.0119139	0.0134389	0.0146915	0.00774087	0.0198464		L02	2	88	8.42784	7.54809	5.9894	10.4182	11.7518	12.8472	6.76907	17.3548
L02	2	137	0.00150059	0.00923951	0.00806967	0.0078721	0.00999417	0.00986338	0.00152567	0.00747544		L02	2	137	1.39707	8.07957	7.05659	6.88383	8.73949	8.62513	1.33413	6.53696
L03	3	0	0	0	0	0	0	0	0	0		L03	3	0
L03	3	13	0.0414273	0.000751612	0.00209223	0.00867427	0.00102522	0.00130611	0.0201527			L03	3	13	38.5694	0.837596	2.33158	9.66659	1.14251	1.45553	22.4581
L03	3	23	0.0755511	0.00384443	0.00714964	0.0156353	0.00632353	0.00570747	0.02838	0.0143526		L03	3	23	70.3391	4.28423	7.96755	17.4239	7.04694	6.36039	31.6267	15.9945
L03	3	40	0.0895039	0.0102683	0.0146113	0.0266842	0.0116167	0.0115937	0.0383231			L03	3	40	83.3294	11.443	16.2828	29.7369	12.9457	12.92	42.7072
L03	3	49	0.0880953	0.0140467	0.0178113	0.0285017	0.0122532	0.014259	0.0356701	0.0256492		L03	3	49	82.0179	15.6536	19.8489	31.7622	13.655	15.8902	39.7507	28.5834
L03	3	70	0.0285536	0.0173526	0.0194193	0.0200442	0.0122636	0.0157206	0.0244247			L03	3	70	26.5838	19.3377	21.6409	22.3372	13.6666	17.5191	27.2188
L03	3	90	0.00742533	0.0169193	0.0161761	0.0149743	0.00723069	0.00875173	0.0083945			L03	3	90	6.91309	18.8549	18.0267	16.6873	8.05788	9.75292	9.35483
L03	3	132	0.000278625	0.0178839	0.0178666	0.0104853	0.00909008	0.00833222	0.00585989	0.00597641		L03	3	132	0.259404	19.9298	19.9105	11.6848	10.13	9.28542	6.53026	6.66011
E01	4	0	-0.00401895	0	0	0	0	0	0	0		E01	4	0	-3.7417
E01	4	15	0.050847	0.000739752	0.000417297	0.0188182	0.00301662	-4.73767e-05	0.0264041			E01	4	15	47.3393	0.995113	0.561346	25.3142	4.05795	-0.063731	35.5187
E01	4	29	0.0623554	0.0093707	0.0104187	0.0460245	0.00967363	0.0421667	0.0467597	0.0248155		E01	4	29	58.0538	12.6054	14.0152	61.912	13.0129	56.7225	62.901	33.3817
E01	4	43	0.072861	0.0158725	0.0156675	0.0315458	0.0156511	0.0132461	0.0433321	0.027227		E01	4	43	67.8346	21.3516	21.0759	42.4354	21.0538	17.8186	58.2902	36.6257
E01	4	56	0.0618155	0.0187195	0.0143057	0.0274711	0.0353265	0.0128764	0.0356628	0.0172603		E01	4	56	57.5511	25.1814	19.244	36.954	47.521	17.3213	47.9735	23.2185
E01	4	71	0.0214545	0.020528		0.0203133	0.0120146	0.0197553	0.0204054			E01	4	71	19.9745	27.6142	0	27.3254	16.162	26.5747	27.4493
E02	5	0	-0.00383839	0	0	0	0	0	0	0		E02	5	0	-3.5736
E02	5	13	0.0326783	-0.00185762	-0.00244801	0.0077306	0.0113143	-0.00103477	0.0119215	0.0149654		E02	5	13	30.424	-2.37308	-3.12729	9.87569	14.4538	-1.3219	15.2295	19.118
E02	5	28	0.0658367	0.003601	0.0337553	0.0213193	0.0523255	0.00992059	0.0260817	0.0154987		E02	5	28	61.2949	4.60021	43.1217	27.235	66.8448	12.6734	33.3188	19.7992
E02	5	40	0.07167	0.00671206	0.0212088	0.0293157	0.0535833	0.0161585	0.0355064	0.0232169		E02	5	40	66.7257	8.57452	27.0939	37.4503	68.4516	20.6422	45.3588	29.6591
E02	5	48	0.071901	0.00798904	0.0177543	0.0276539	0.0536398	0.0203293	0.0356627	0.0252354		E02	5	48	66.9408	10.2058	22.6808	35.3274	68.5238	25.9703	45.5584	32.2377
E02	5	68	0.0208212	0.0126976	0.0242908	0.0118535	0.0372397	0.0202113	0.0208454	0.0103387		E02	5	68	19.3849	16.2209	31.0311	15.1426	47.573	25.8196	26.6296	13.2075
E02	5	90	0.00140138	0.0114061	0.0148232	0.00543033	0.0261455	0.0106869	0.00962835	0.00940648		E02	5	90	1.30471	14.5711	18.9364	6.93714	33.4004	13.6523	12.3	12.0166
E02	5	126	-0.000764531	0.0149783	0.0127689	0.000820957	0.0203915	0.00951366	0.00565842	-0.00663954		E02	5	126	-0.71179	19.1345	16.3121	1.04876	26.0498	12.1535	7.22853	-8.48188
E02	5	238	-0.00241338	0.011041	0.0129911	0.00169997	0.0184639	0.0041165	0.000981151	-0.00700734		E02	5	238	-2.24689	14.1046	16.5959	2.17167	23.5872	5.25874	1.2534	-8.95175
E02	5	384		0.00595637	0.0037776	-0.000266925	0.0102345	0.00182592	0.00111661	-0.00544983		E02	5	384		7.60914	4.82581	-0.340991	13.0743	2.33258	1.42645	-6.96205
L04	6	0	-0.00113946	0	0	0	0	0	0	0		L04	6	0	-1.06085
L04	6	14	0.0514913	-0.00120374	-0.000604486	0.0116688	0.00238831	0.000324863	0.0192356	0.0328165		L04	6	14	47.9391	-1.15471	-0.579867	11.1936	2.29104	0.311632	18.4522	31.48
L04	6	28	0.0874028	0.00541606	0.0110298	0.0230338	0.00541796	0.00787816	0.0391342	0.0514892		L04	6	28	81.3733	5.19548	10.5806	22.0957	5.1973	7.55731	37.5404	49.3922
L04	6	42	0.106102	0.00907384	0.0156126	0.0314471	0.00807888	0.0114981	0.0536299	0.0573414		L04	6	42	98.782	8.70429	14.9767	30.1663	7.74985	11.0298	51.4457	55.0061
L04	6	62	0.056654	0.0165317	0.0179591	0.0288581	0.0105899	0.018147	0.0367729	0.0352307		L04	6	62	52.7457	15.8584	17.2277	27.6828	10.1586	17.4079	35.2753	33.7959
L04	6	77	0.0194698	0.0168865	0.0157236	0.0221913	0.00889336	0.0113681	0.020089	0.0226789		L04	6	77	18.1267	16.1987	15.0832	21.2875	8.53116	10.9051	19.2708	21.7552
L04	6	91	0.00524692	0.0153453	0.0152253	0.0179187	0.00886176	0.011272	0.018466	0.0161298		L04	6	91	4.88496	14.7204	14.6052	17.1889	8.50085	10.8129	17.714	15.4729
L04	6	148	-0.00440306	0.012454	0.0131896	0.00877634	0.0074513	0.00744719	0.0124889	0.00791134		L04	6	148	-4.09931	11.9468	12.6524	8.41891	7.14783	7.14389	11.9802	7.58913
L04	6	273		0.0101347	0.00660842	0.00435394	0.00273173	0.00173763	0.0046275	0.00262587		L04	6	273		9.72199	6.33928	4.17661	2.62048	1.66686	4.43903	2.51893
L04	6	342		0.00621217	0.00761459	0.00187517	0.00207147	0.00369758	0.00365527	-0.00264135		L04	6	342		5.95917	7.30447	1.7988	1.98711	3.54698	3.50641	-2.53377

## Sheet: ExtraInfo
Figure 4 and 7-source code and data 1: fraction and C used to calculate corrected enrichment.
Pat	ID in paper	ID	f	c
E02	A	5	0.0190139	3.9097
E01	B	4	0.0102745	7.6188
L01	C	1	0.0187932	5.547
L03	D	3	0.0215648	4.9808
L04	E	6	0.0304804	3.7518
L02	F	2	0.0170197	5.2724

## Sheet: R Granulocyten  urine modeling
Figure 4 and 7-source code and data 1: granulocytes and urine modelling
#### fit Urine ####
prm.ur.gra<-data.frame
###### Granulocytes #####
data.gra<-data_APE[!is.na(data_APE$granulos),]
data.gra$granulos<-ifelse(data.gra$granulos<0,0,data.gra$granulos)
model.ur_gra<-function(psi){
tim<-data_urine$timeS[data_urine$ID == i]
tau2<-data_Extra$tstop[data_Extra$ID==i]
out<-Su(tim,tau2,f=psi[1],delta=psi[2],S0=psi[3])
out_cost<- ( data.fit - out )
nobs<-length(data.fit)
SSR.urine <- sum(out_cost^2)
Lik.urine <- ((2*pi*(exp(psi[6]))^2)^(-nobs/2))*exp(-SSR.urine/(2*(exp(psi[6]))^2))
time<-data.gra$timeS[data.gra$ID == i]
out_gra<-L_b1(time,p1=psi[4],c=psi[5],tau2,f=psi[1],delta=psi[2],S0=psi[3])
out2<-ifelse(out_gra<0,0,asin(sqrt(out_gra)))
out_cost2<- ( data.fit2 - out2 )
SSR.gra <- sum(out_cost2^2)
nobs2<-length(data.fit2)
Lik.gra <- ((2*pi*(exp(psi[7]))^2)^(-nobs2/2))*exp(-SSR.gra/(2*(exp(psi[7]))^2))
minlogl <- -log(Lik.urine*Lik.gra)
return(minlogl)
}
for (i in seq(1,6,1)) {
data.fit<-data_urine$Urine[data_urine$ID == i]
data.fit2<-asin(sqrt(data.gra$granulos[data.gra$ID == i] ))
estim<-nlminb(c(0.1,0.1,0.01,0.05,4,0.5,0.2),model.ur_gra,upper=c(1,1,1,1,10,Inf,Inf),lower=c(0,0,0,0,0,-Inf,-Inf))#,method="Marq")
if (i==1) prm.ur.gra<-estim$par
else prm.ur.gra<-cbind(prm.ur.gra,estim$par)
}
for (i in seq(1,6,1)) {
subj<-data_urine$Pat[data_urine$ID == i]
colnames(prm.ur.gra)[i]<-as.character(subj[1]) }
rownames(prm.ur.gra)<-c("f","delta","S0","p_gra","c","sd.Ur", "sd.Gra")
prm.ur.gra
#### plot ####
xfit<-seq(0,130,1)
par(mfrow=c(2,3))
for (i in seq(1,6,1)){
tau2<-data_Extra$tstop[data_Extra$ID==i]
f1<-as.numeric(prm.ur.gra[1,i])
delta1<-as.numeric(prm.ur.gra[2,i])
S01<-as.numeric(prm.ur.gra[3,i])
data.urine<-data_urine$Urine[data_urine$ID == i]
tim<-data_urine$timeS[data_urine$ID == i]
subj<-data_urine$Pat[data_urine$ID == i]
yfit<- Su(xfit,tau2,f1,delta1,S01)
plot(tim,data.urine, main=paste0("Subject ",subj[1] ), xlab="time (days)", ylab="Percentage Labeled",xlim=c(0,130),ylim=c(0,0.04))
lines(spline(xfit,yfit),col="black")
}
#### plot ####
xfit<-seq(0,350,1)
par(mfrow=c(2,3))
for (i in seq(1,6,1)){
tau2<-data_Extra$tstop[data_Extra$ID==i]
f<-as.numeric(prm.ur.gra[1,i])
delta<-as.numeric(prm.ur.gra[2,i])
S0<-as.numeric(prm.ur.gra[3,i])
p1<-as.numeric(prm.ur.gra[4,i])
c1<-as.numeric(prm.ur.gra[5,i])
data.pred<-data.gra$granulos[data.gra$ID == i]
tim<-data.gra$timeS[data.gra$ID == i]
subj<-data.gra$Pat[data.gra$ID == i]
yfit<- L_b1(xfit,p1,c1,tau2,f,delta,S0)
plot(tim,data.pred, main=paste0("Subject ",subj[1] ), xlab="time (days)", ylab="Percentage Labeled",xlim=c(0,350),ylim=c(0,0.15))
lines(spline(xfit,yfit),col="black")
}
################ Confidence limits ###############################
res.ur<-data.frame
res.gra<-data.frame
res.tot<-data.frame
boot<-data.frame
CI<-data.frame
theta.urgra<-function(residual){
res1<-residual[1:n1] # for urine
res2<-residual[n1+1:n2] # for granulocytes
model.urgra.res<-function(psi){
data.fit<-data_urine$Urine[data_urine$ID == i]
tim<-data_urine$timeS[data_urine$ID == i]
tau2<-data_Extra$tstop[data_Extra$ID==i]
out<-Su(tim,tau2,f=psi[1],delta=psi[2],S0=psi[3])
out_cost<- ( data.fit+res1 - out )
nobs<-length(data.fit)
SSR.urine <- sum(out_cost^2)
Lik.urine <- ((2*pi*(exp(psi[6]))^2)^(-nobs/2))*exp(-SSR.urine/(2*(exp(psi[6]))^2))
time<-data.gra$timeS[data.gra$ID == i]
data.fit2<-data.gra$granulos[data.gra$ID == i]
out_gra<-L_b1(time,p1=psi[4],c=psi[5],tau2,f=psi[1],delta=psi[2],S0=psi[3])
out2<-ifelse(out_gra<0,0,asin(sqrt(out_gra)))
out_cost2<- ( asin(sqrt(data.fit2+res2)) - out2 )
SSR.gra <- sum(out_cost2^2)
nobs2<-length(data.fit2)
Lik.gra <- ((2*pi*(exp(psi[7]))^2)^(-nobs2/2))*exp(-SSR.gra/(2*(exp(psi[7]))^2))
minlogl <- -log(Lik.urine*Lik.gra)
return(minlogl)
}
estim<-nlminb(as.numeric(prm.ur.gra[,i]),model.urgra.res)#,upper=c(10,10,10),lower=c(0,0,0),method="Marq")
return(estim$par)
}
for (i in seq(1,6,1)) {
tau2<-data_Extra$tstop[data_Extra$ID==i]
f1<-as.numeric(prm.ur.gra[1,i])
delta1<-as.numeric(prm.ur.gra[2,i])
S01<-as.numeric(prm.ur.gra[3,i])
tim<-data_urine$timeS[data_urine$ID == i]
subj<-data_urine$Pat[data_urine$ID == i]
data.fit<-data_urine$Urine[data_urine$ID == i]
res.ur<- data.fit-Su(tim,tau2,f1,delta1,S01)
n1<-length(tim)
p1<-as.numeric(prm.ur.gra[4,i])
c1<-as.numeric(prm.ur.gra[5,i])
data.fit2<-data.gra$granulos[data.gra$ID == i]
time<-data.gra$timeS[data.gra$ID == i]
n2<-length(time)
res.gra<-data.fit2 - L_b1(time,p1,c1,tau2,f1,delta1,S01)
res.tot<-c(res.ur,res.gra)
boot<-bootstrap2(res.tot,500,theta.urgra)
resu<-boot$thetastar
# print(resu.ur)
#### 95%CI ####
conf.level<-0.95
probs<-(1+c(-1,1)*conf.level)/2
print(as.character(subj[1]))
print("95%CI of f")
print(quantile(resu[1,],probs=probs)) # 95CI of f
print("95%CI of delta")
print(quantile(resu[2,],probs=probs)) # 95CI of delta
print("95%CI of S0")
print(quantile(resu[3,],probs=probs)) # 95CI of S0
print("95%CI of p_gra")
print(quantile(resu[4,],probs=probs)) # 95CI of p_gra
print("95%CI of c")
print(quantile(resu[5,],probs=probs)) # 95CI of c
print("95%CI of sd ur")
print(quantile(resu[6,],probs=probs)) # 95CI of sd_ur
print("95%CI of sd gra")
print(quantile(resu[7,],probs=probs)) # 95CI of sd_gra
print("")
print("")
}
# ""

## Sheet: R CD4 subset  modeling 
Figure 4 and 7-source code and data 1: CD4 subset modeling
###########################################################################################################
######################
###### Naive CD4 #####
######################
###########################################################################################################
prm.N4<-data.frame
#### labeling data ####
data.N4<-data_APE[!is.na(data_APE$N4),]
data.N4$N4<-ifelse(data.N4$N4<0,0,data.N4$N4)
####### cell numbers ############
prm.N4n<-data.frame
data.N4n<-data_cells[!is.na(data_cells$N4_n),]
## likelihood function : tp4, dn4, n04, sdln4,sdn4
cost.N4 <- function(psi){
tim<-data.N4$timeS[data.N4$ID == i]
tau2<-data_Extra$tstop[data_Extra$ID==i]
f<-as.numeric(prm.ur.gra[1,i])
delta<-as.numeric(prm.ur.gra[2,i])
S0<-as.numeric(prm.ur.gra[3,i])
c<-as.numeric(prm.ur.gra[5,i])
out<-ode(y=c(ln=0), times=tim, func = diff.ln, parms =c(tp4=psi[1],c=c,tau=tau2,f=f,delta=delta,S0=S0), rtol = 1e-12)
N4_pred<-out[,2]
out2<-ifelse(N4_pred<0,0,asin(sqrt(N4_pred)))
out_cost<- ( data.fit - out2 )
nobs<-length(data.fit)
SSR.ln4 <- sum(out_cost^2)
Lik.ln4 <- ((2*pi*(exp(psi[4]))^2)^(-nobs/2))*exp(-SSR.ln4/(2*(exp(psi[4]))^2))
tim_n4<-data.N4n$timeIncl[data.N4n$ID == i]
out.n4<-naive_func(tim_n4,n04=psi[2],dn4=psi[3],tp4=psi[1])
out_cost2<- ( log10(data.fit2) - log10(out.n4) )
SSR.n4 <- sum(out_cost2^2)
nobs2<-length(data.fit2)
Lik.n4 <- ((2*pi*(exp(psi[5]))^2)^(-nobs2/2))*exp(-SSR.n4/(2*(exp(psi[5]))^2))
minlogl <- -log(Lik.ln4*Lik.n4)
return(minlogl)
}
for (i in seq(1,6,1)) {
data.fit<-asin(sqrt(data.N4$N4[data.N4$ID == i] ))
data.fit2<-data.N4n$N4_n[data.N4n$ID == i]
estim<-nlminb(c(-5,5,-5,0.002,10),cost.N4,lower=c(-15,0,-15,-Inf,-Inf),upper=c(0,20,0,Inf,Inf))
if (i==1) prm.N4<-estim$par
else prm.N4<-cbind(prm.N4,estim$par)
}
prm.N4
for (i in seq(1,6,1)) {
subj<-data.N4$Pat[data.N4$ID == i]
colnames(prm.N4)[i]<-as.character(subj[1]) }
rownames(prm.N4)<-c("p_tot","n04","dn4", "sdEr APE", "sdEr N")
prm.N4
############# INDIVIDUAL PLOTS ########################
xfit<-seq(0,400,1)
par(mfrow=c(2,3))
for (i in seq(1,6,1)){
tau2<-data_Extra$tstop[data_Extra$ID==i]
f<-as.numeric(prm.ur.gra[1,i])
delta<-as.numeric(prm.ur.gra[2,i])
S0<-as.numeric(prm.ur.gra[3,i])
c<-as.numeric(prm.ur.gra[5,i])
data.pred<-data.N4$N4[data.N4$ID == i]
tim<-data.N4$timeS[data.N4$ID == i]
subj<-data.N4$Pat[data.N4$ID == i]
p_tot<-as.numeric(prm.N4[1,i])
pred<-ode(y=c(ln=0), tim=xfit, func = diff.ln, parms =c(tp4=p_tot,c=c,tau=tau2,f=f,delta=delta,S0=S0), rtol = 1e-12)
yfit<-pred[,2]
plot(tim,data.pred, main=paste0("Subject ",subj[1], "N4" ), xlab="time (days)", ylab="Percentage Labeled",xlim=c(0,350),ylim=c(0,0.05))
lines(spline(xfit,yfit),col="black")
}
for (i in seq(1,6,1)){
data.pred<-data.N4n$N4_n[data.N4n$ID == i]
tim<-data.N4n$timeIncl[data.N4n$ID == i]
subj<-data.N4n$Pat[data.N4n$ID == i]
tp<-as.numeric(prm.N4[1,i])
n0<-as.numeric(prm.N4[2,i])
dn<-as.numeric(prm.N4[3,i])
yfit<-naive_func(xfit,n04=n0,dn4=dn,tp4=tp)
plot(tim,data.pred, main=paste0("Subject ",subj[1], "N4" ), xlab="time (days)", ylab="Cell Numbers/ml",xlim=c(0,350),ylim=c(0,300000))
lines(spline(xfit,yfit),col="black")
}
########################################################################################
exp(prm.N4)
########################################################################################
################ Confidence limits ###############################
res.ape<-data.frame
res.num<-data.frame
res.tot<-data.frame
boot<-data.frame
theta.res<-function(residual){
res1<-residual[1:n1] # for ape
res2<-residual[n1+1:n2] # for num
model.res<-function(psi){
data.fit<-asin(sqrt(data.N4$N4[data.N4$ID == i]+res1 ))
tim<-data.N4$timeS[data.N4$ID == i]
tau2<-data_Extra$tstop[data_Extra$ID==i]
f<-as.numeric(prm.ur.gra[1,i])
delta<-as.numeric(prm.ur.gra[2,i])
S0<-as.numeric(prm.ur.gra[3,i])
c<-as.numeric(prm.ur.gra[5,i])
out<-ode(y=c(ln=0), times=tim, func = diff.ln, parms =c(tp4=psi[1],c=c,tau=tau2,f=f,delta=delta,S0=S0), rtol = 1e-12)
N4_pred<-out[,2]
out2<-ifelse(N4_pred<0,0,asin(sqrt(N4_pred)))
out_cost<- ( data.fit - out2 )
nobs<-length(data.fit)
SSR.ln4 <- sum(out_cost^2)
Lik.ln4 <- ((2*pi*(exp(psi[4]))^2)^(-nobs/2))*exp(-SSR.ln4/(2*(exp(psi[4]))^2))
data.fit2<-data.N4n$N4_n[data.N4n$ID == i]
tim_n4<-data.N4n$timeIncl[data.N4n$ID == i]
out.n4<-naive_func(tim_n4,n04=psi[2],dn4=psi[3],tp4=psi[1])
out_cost2<- ( log10(data.fit2+res2) - log10(out.n4) )
SSR.n4 <- sum(out_cost2^2)
nobs2<-length(data.fit2)
Lik.n4 <- ((2*pi*(exp(psi[5]))^2)^(-nobs2/2))*exp(-SSR.n4/(2*(exp(psi[5]))^2))
minlogl <- -log(Lik.ln4*Lik.n4)
return(minlogl)
}
estim<-nlminb(as.numeric(prm.N4[,i]),model.res)#,upper=c(10,10,10),lower=c(0,0,0),method="Marq")
return(estim$par)
}
for (i in seq(1,6,1)) {
tau2<-data_Extra$tstop[data_Extra$ID==i]
f1<-as.numeric(prm.ur.gra[1,i])
delta1<-as.numeric(prm.ur.gra[2,i])
S01<-as.numeric(prm.ur.gra[3,i])
c<-as.numeric(prm.ur.gra[5,i])
tim<-data.N4$timeS[data.N4$ID == i]
data.ape<-data.N4$N4[data.N4$ID == i]
out.res<-ode(y=c(ln=0), times=tim, func = diff.ln, parms =c(tp4=prm.N4[1,i],c=c,tau=tau2,f=f1,delta=delta1,S0=S01), rtol = 1e-12)
res.ape<- data.ape-out.res[,2]
n1<-length(tim)
data.num<-data.N4n$N4_n[data.N4n$ID == i]
time<-data.N4n$timeIncl[data.N4n$ID == i]
n2<-length(time)
res.num<-data.num - naive_func(time,n04=prm.N4[2,i],dn4=prm.N4[3,i],tp4=prm.N4[1,i])
subj<-data.N4n$Pat[data.N4n$ID == i]
res.tot<-c(res.ape,res.num)
boot<-bootstrap2(res.tot,500,theta.res)
resu<-boot$thetastar
#### 95%CI ####
conf.level<-0.95
probs<-(1+c(-1,1)*conf.level)/2
print(as.character(subj[1]))
print("95%CI of tp4")
print(quantile(resu[1,],probs=probs)) # 95CI of tp4
print("95%CI of n0")
print(quantile(resu[2,],probs=probs)) # 95CI of n04
print("95%CI of dn")
print(quantile(resu[3,],probs=probs)) # 95CI of dn4
print("95%CI of sd ape")
print(quantile(resu[4,],probs=probs)) # 95CI of sd_ape
print("95%CI of sd num")
print(quantile(resu[5,],probs=probs)) # 95CI of sd_num
print("")
print("")
}
###########################################################################################################
######################
##### Memory CD4 #####
######################
###########################################################################################################
prm.M4<-data.frame
#### labeling data ####
data.M4<-data_APE[!is.na(data_APE$M4),]
data.M4$M4<-ifelse(data.M4$M4<0,0,data.M4$M4)
####### cell numbers ############
prm.M4n<-data.frame
data.M4n<-data_cells[!is.na(data_cells$M4_n),]
## likelihood function : p1, p2, alpha, m04, dm4, sdlm4,sdm4
cost.M4 <- function(psi){
tim<-data.M4$timeS[data.M4$ID == i]
tau2<-data_Extra$tstop[data_Extra$ID==i]
f<-as.numeric(prm.ur.gra[1,i])
delta<-as.numeric(prm.ur.gra[2,i])
S0<-as.numeric(prm.ur.gra[3,i])
c<-as.numeric(prm.ur.gra[5,i])
out<-ode(y=c(lm1=0,lm2=0), times=tim, func = diff.lm.2comp, parms =c(p1=psi[1],p2=psi[2],c=c,tau=tau2,f=f,delta=delta,S0=S0), rtol = 1e-12)
M4_pred<-exp(psi[3])*out[,2]+(1-exp(psi[3]))*out[,3]
out1<-ifelse(M4_pred<0,0,asin(sqrt(M4_pred)))
out_cost<- ( data.fit - out1 )
nobs<-length(data.fit)
SSR.lm4 <- sum(out_cost^2)
Lik.lm4 <- ((2*pi*(exp(psi[6]))^2)^(-nobs/2))*exp(-SSR.lm4/(2*(exp(psi[6]))^2))
p_a<-exp(psi[3])*exp(psi[1])+(1-exp(psi[3]))*exp(psi[2])
tim_m4<-data.M4n$timeIncl[data.M4n$ID == i]
out.m4<-m_cells(tim_m4,m0=psi[4],pm=log(p_a),dm=psi[5])
out_cost2<- ( log10(data.fit2) - log10(out.m4) )
SSR.m4 <- sum(out_cost2^2)
nobs2<-length(data.fit2)
Lik.m4 <- ((2*pi*(exp(psi[7]))^2)^(-nobs2/2))*exp(-SSR.m4/(2*(exp(psi[7]))^2))
minlogl <- -log(Lik.lm4*Lik.m4)
return(minlogl)
}
for (i in seq(1,6,1)) {
data.fit<-asin(sqrt(data.M4$M4[data.M4$ID == i] ))
data.fit2<-data.M4n$M4_n[data.M4n$ID == i]
estim<-nlminb(c(-8,-4,-0.5,5,-3,0.02,5),cost.M4,upper=c(0,0,0,Inf,0,Inf,Inf),lower=c(-15,-15,-15,2,-15,-Inf,-Inf))
if (i==1) prm.M4<-estim$par
else prm.M4<-cbind(prm.M4,estim$par)
}
prm.M4
prm.M4<-rbind(prm.M4,exp(prm.M4[3,])*exp(prm.M4[1,])+(1-exp(prm.M4[3,]))*exp(prm.M4[2,]))
for (i in seq(1,6,1)) {
subj<-data.M4$Pat[data.M4$ID == i]
colnames(prm.M4)[i]<-as.character(subj[1]) }
rownames(prm.M4)<-c("p1","p2","alpha", "m04","dm4", "sdEr APE", "sdEr M","p_ave")
prm.M4
############# INDIVIDUAL PLOTS ########################
par(mfrow=c(2,3))
xfit<-seq(0,400,1)
for (i in seq(1,6,1)){
tau2<-data_Extra$tstop[data_Extra$ID==i]
f<-as.numeric(prm.ur.gra[1,i])
delta<-as.numeric(prm.ur.gra[2,i])
S0<-as.numeric(prm.ur.gra[3,i])
c<-as.numeric(prm.ur.gra[5,i])
data.pred2<-data.M4$M4[data.M4$ID == i]
tim<-data.M4$timeS[data.M4$ID == i]
subj<-data.M4$Pat[data.M4$ID == i]
p1<-as.numeric(prm.M4[1,i])
p2<-as.numeric(prm.M4[2,i])
alpha<-as.numeric(prm.M4[3,i])
pred<-ode(y=c(lm1=0,lm2=0), tim=xfit, func = diff.lm.2comp, parms =c(p1=p1,p2=p2,c=c,tau=tau2,f=f,delta=delta,S0=S0), rtol = 1e-12)
yfit_m<-exp(alpha)*pred[,2]+(1-exp(alpha))*pred[,3]
plot(tim,data.pred2, main=paste0("Subject ",subj[1], "M4" ), xlab="time (days)", ylab="Percentage Labeled",xlim=c(0,350),ylim=c(0,0.05))
lines(spline(xfit,yfit_m),col="black")
}
par(mfrow=c(2,3))
for (i in seq(1,6,1)){
data.pred<-data.M4n$M4_n[data.M4n$ID == i]
tim<-data.M4n$timeIncl[data.M4n$ID == i]
subj<-data.M4n$Pat[data.M4n$ID == i]
pm<-as.numeric(prm.M4[8,i])
m04<-as.numeric(prm.M4[4,i])
dm<-as.numeric(prm.M4[5,i])
out1<-m_cells(xfit,m0=m04,pm=log(pm),dm=dm)
yfit<-out1
plot(tim,data.pred, main=paste0("Subject ",subj[1], "M4" ), xlab="time (days)", ylab="Cell Numbers/ml",xlim=c(0,350),ylim=c(0,600000))
lines(spline(xfit,yfit),col="black")
}
########################################################################################
prm.M4.tot<-rbind(exp(prm.M4[1:7,]),prm.M4[8,])
rownames(prm.M4.tot)<-rownames(prm.M4)
prm.M4.tot
########################################################################################
################ Confidence limits ###############################
res.ape<-data.frame
res.num<-data.frame
res.tot<-data.frame
boot<-data.frame
theta.res<-function(residual){
res1<-residual[1:n1] # for ape
res2<-residual[n1+1:n2] # for num
model.res<-function(psi){
data.fit<-asin(sqrt(data.M4$M4[data.M4$ID == i]+res1 ))
tim<-data.M4$timeS[data.M4$ID == i]
tau2<-data_Extra$tstop[data_Extra$ID==i]
f<-as.numeric(prm.ur.gra[1,i])
delta<-as.numeric(prm.ur.gra[2,i])
S0<-as.numeric(prm.ur.gra[3,i])
c<-as.numeric(prm.ur.gra[5,i])
out<-ode(y=c(lm1=0,lm2=0), times=tim, func = diff.lm.2comp, parms =c(p1=psi[1],p2=psi[2],c=c,tau=tau2,f=f,delta=delta,S0=S0), rtol = 1e-12)
M4_pred<-exp(psi[3])*out[,2]+(1-exp(psi[3]))*out[,3]
out2<-ifelse(M4_pred<0,0,asin(sqrt(M4_pred)))
out_cost<- ( data.fit - out2 )
nobs<-length(data.fit)
SSR.lM4 <- sum(out_cost^2)
Lik.lM4 <-((2*pi*(exp(psi[6]))^2)^(-nobs/2))*exp(-SSR.lM4/(2*(exp(psi[6]))^2))
p_a<-exp(psi[3])*exp(psi[1])+(1-exp(psi[3]))*exp(psi[2])
data.fit2<-data.M4n$M4_n[data.M4n$ID == i]
tim_M4<-data.M4n$timeIncl[data.M4n$ID == i]
out.M4<-m_cells(tim_M4,m0=psi[4],pm=log(p_a),dm=psi[5])
out_cost2<- ( log10(data.fit2+res2) - log10(out.M4) )
SSR.M4 <- sum(out_cost2^2)
nobs2<-length(data.fit2)
Lik.M4 <- ((2*pi*(exp(psi[7]))^2)^(-nobs2/2))*exp(-SSR.M4/(2*(exp(psi[7]))^2))
minlogl <- -log(Lik.lM4*Lik.M4)
return(minlogl)
}
estim<-nlminb(as.numeric(prm.M4[1:7,i]),model.res)#,upper=c(10,10,10),lower=c(0,0,0),method="Marq")
return(estim$par)
}
for (i in seq(1,6,1)) {
tau2<-data_Extra$tstop[data_Extra$ID==i]
f1<-as.numeric(prm.ur.gra[1,i])
delta1<-as.numeric(prm.ur.gra[2,i])
S01<-as.numeric(prm.ur.gra[3,i])
c<-as.numeric(prm.ur.gra[5,i])
p1<-as.numeric(prm.M4[1,i])
p2<-as.numeric(prm.M4[2,i])
alpha<-as.numeric(prm.M4[3,i])
tim<-data.M4$timeS[data.M4$ID == i]
data.ape<-data.M4$M4[data.M4$ID == i]
pred<-ode(y=c(lm1=0,lm2=0), tim=tim, func = diff.lm.2comp, parms =c(p1=p1,p2=p2,c=c,tau=tau2,f=f1,delta=delta1,S0=S01), rtol = 1e-12)
yfit_m<-exp(alpha)*pred[,2]+(1-exp(alpha))*pred[,3]
res.ape<- data.ape - yfit_m
n1<-length(tim)
data.num<-data.M4n$M4_n[data.M4n$ID == i]
time<-data.M4n$timeIncl[data.M4n$ID == i]
n2<-length(time)
pm<-as.numeric(prm.M4[8,i])
m04<-as.numeric(prm.M4[4,i])
dm<-as.numeric(prm.M4[5,i])
res.num<-data.num - m_cells(time,m0=m04,pm=log(pm),dm=dm)
subj<-data.M4n$Pat[data.M4n$ID == i]
res.tot<-c(res.ape,res.num)
# print(i)
# print(res.tot)
boot<-bootstrap2(res.tot,500,theta.res)
resu<-boot$thetastar
p_ave<-exp(resu[3,])*exp(resu[1,])+(1-exp(resu[3,]))*exp(resu[2,])
#### 95%CI ####
conf.level<-0.95
probs<-(1+c(-1,1)*conf.level)/2
print(as.character(subj[1]))
print("95%CI of p1")
print(quantile(resu[1,],probs=probs)) # 95CI of p1
print("95%CI of p2")
print(quantile(resu[2,],probs=probs)) # 95CI of p2
print("95%CI of alpha")
print(quantile(resu[3,],probs=probs)) # 95CI of alpha
print("95%CI of m0")
print(quantile(resu[4,],probs=probs)) # 95CI of m0
print("95%CI of dm")
print(quantile(resu[5,],probs=probs)) # 95CI of dm
print("95%CI of sd ape")
print(quantile(resu[6,],probs=probs)) # 95CI of sd ape
print("95%CI of sd num")
print(quantile(resu[7,],probs=probs)) # 95CI of sd num
print("95%CI of p_ave")
print(quantile(p_ave,probs=probs)) # 95CI of p_ave
print("")
print("")
}

## Sheet: R CD8  subset  modeling
Figure 4 and 7-source code and data 1: CD8 naïve and memory Modeling
######################
###### Naive CD8 #####
######################
###########################################################################################################
prm.N8<-data.frame
#### labeling data ####
data.N8<-data_APE[!is.na(data_APE$N8),]
data.N8$N8<-ifelse(data.N8$N8<0,0,data.N8$N8)
####### cell numbers ############
prm.N8n<-data.frame
data.N8n<-data_cells[!is.na(data_cells$N8_n),]
## likelihood function : tp4, dN8, n04, sdlN8,sdN8
cost.N8 <- function(psi){
tim<-data.N8$timeS[data.N8$ID == i]
tau2<-data_Extra$tstop[data_Extra$ID==i]
f<-as.numeric(prm.ur.gra[1,i])
delta<-as.numeric(prm.ur.gra[2,i])
S0<-as.numeric(prm.ur.gra[3,i])
c<-as.numeric(prm.ur.gra[5,i])
out<-ode(y=c(ln=0), times=tim, func = diff.ln, parms =c(tp4=psi[1],c=c,tau=tau2,f=f,delta=delta,S0=S0), rtol = 1e-12)
N8_pred<-out[,2]
out2<-ifelse(N8_pred<0,0,asin(sqrt(N8_pred)))
out_cost<- ( data.fit - out2 )
nobs<-length(data.fit)
SSR.lN8 <- sum(out_cost^2)
Lik.lN8 <- ((2*pi*(exp(psi[4]))^2)^(-nobs/2))*exp(-SSR.lN8/(2*(exp(psi[4]))^2))
tim_N8<-data.N8n$timeIncl[data.N8n$ID == i]
out.N8<-naive_func(tim_N8,n04=psi[2],dn4=psi[3],tp4=psi[1])
out_cost2<- ( log10(data.fit2) - log10(out.N8) )
SSR.N8 <- sum(out_cost2^2)
nobs2<-length(data.fit2)
Lik.N8 <- ((2*pi*(exp(psi[5]))^2)^(-nobs2/2))*exp(-SSR.N8/(2*(exp(psi[5]))^2))
minlogl <- -log(Lik.lN8*Lik.N8)
return(minlogl)
}
for (i in seq(1,6,1)) {
data.fit<-asin(sqrt(data.N8$N8[data.N8$ID == i] ))
data.fit2<-data.N8n$N8_n[data.N8n$ID == i]
estim<-nlminb(c(-5,5,-5,0.002,10),cost.N8,lower=c(-15,0,-15,-Inf,-Inf),upper=c(0,20,0,Inf,Inf))
#mle(minuslogl = cost.N8, start=as.list(c(-3,5,-5,0.2,10)))
if (i==1) prm.N8<-estim$par
else prm.N8<-cbind(prm.N8,estim$par)
}
prm.N8
for (i in seq(1,6,1)) {
subj<-data.N8$Pat[data.N8$ID == i]
colnames(prm.N8)[i]<-as.character(subj[1]) }
rownames(prm.N8)<-c("p_tot","n08","dN8", "sdEr APE", "sdEr N")
prm.N8
############# INDIVIDUAL PLOTS ########################
xfit<-seq(0,400,1)
par(mfrow=c(2,3))
for (i in seq(1,6,1)){
tau2<-data_Extra$tstop[data_Extra$ID==i]
f<-as.numeric(prm.ur.gra[1,i])
delta<-as.numeric(prm.ur.gra[2,i])
S0<-as.numeric(prm.ur.gra[3,i])
c<-as.numeric(prm.ur.gra[5,i])
data.pred<-data.N8$N8[data.N8$ID == i]
tim<-data.N8$timeS[data.N8$ID == i]
subj<-data.N8$Pat[data.N8$ID == i]
p_tot<-as.numeric(prm.N8[1,i])
pred<-ode(y=c(ln=0), tim=xfit, func = diff.ln, parms =c(tp4=p_tot,c=c,tau=tau2,f=f,delta=delta,S0=S0), rtol = 1e-12)
yfit<-pred[,2]
plot(tim,data.pred, main=paste0("Subject ",subj[1], "N8" ), xlab="time (days)", ylab="Percentage Labeled",xlim=c(0,350),ylim=c(0,0.05))
lines(spline(xfit,yfit),col="black")
}
for (i in seq(1,6,1)){
data.pred<-data.N8n$N8_n[data.N8n$ID == i]
tim<-data.N8n$timeIncl[data.N8n$ID == i]
subj<-data.N8n$Pat[data.N8n$ID == i]
tp<-as.numeric(prm.N8[1,i])
n0<-as.numeric(prm.N8[2,i])
dn<-as.numeric(prm.N8[3,i])
yfit<-naive_func(xfit,n04=n0,dn4=dn,tp4=tp)
plot(tim,data.pred, main=paste0("Subject ",subj[1], "N8" ), xlab="time (days)", ylab="Cell Numbers/ml",xlim=c(0,350),ylim=c(0,300000))
lines(spline(xfit,yfit),col="black")
}
########################################################################################
exp(prm.N8)
########################################################################################
################ Confidence limits ###############################
res.ape<-data.frame
res.num<-data.frame
res.tot<-data.frame
boot<-data.frame
theta.res<-function(residual){
res1<-residual[1:n1] # for ape
res2<-residual[n1+1:n2] # for num
model.res<-function(psi){
data.fit<-asin(sqrt(data.N8$N8[data.N8$ID == i]+res1 ))
tim<-data.N8$timeS[data.N8$ID == i]
tau2<-data_Extra$tstop[data_Extra$ID==i]
f<-as.numeric(prm.ur.gra[1,i])
delta<-as.numeric(prm.ur.gra[2,i])
S0<-as.numeric(prm.ur.gra[3,i])
c<-as.numeric(prm.ur.gra[5,i])
out<-ode(y=c(ln=0), times=tim, func = diff.ln, parms =c(tp4=psi[1],c=c,tau=tau2,f=f,delta=delta,S0=S0), rtol = 1e-12)
N8_pred<-out[,2]
out2<-ifelse(N8_pred<0,0,asin(sqrt(N8_pred)))
out_cost<- ( data.fit - out2 )
nobs<-length(data.fit)
SSR.lN8 <- sum(out_cost^2)
Lik.lN8 <- ((2*pi*(exp(psi[4]))^2)^(-nobs/2))*exp(-SSR.lN8/(2*(exp(psi[4]))^2))
data.fit2<-data.N8n$N8_n[data.N8n$ID == i]
tim_N8<-data.N8n$timeIncl[data.N8n$ID == i]
out.N8<-naive_func(tim_N8,n04=psi[2],dn4=psi[3],tp4=psi[1])
out_cost2<- ( log10(data.fit2+res2) - log10(out.N8) )
SSR.N8 <- sum(out_cost2^2)
nobs2<-length(data.fit2)
Lik.N8 <- ((2*pi*(exp(psi[5]))^2)^(-nobs2/2))*exp(-SSR.N8/(2*(exp(psi[5]))^2))
minlogl <- -log(Lik.lN8*Lik.N8)
return(minlogl)
}
estim<-nlminb(as.numeric(prm.N8[,i]),model.res)#,upper=c(10,10,10),lower=c(0,0,0),method="Marq")
return(estim$par)
}
for (i in seq(1,6,1)) {
tau2<-data_Extra$tstop[data_Extra$ID==i]
f1<-as.numeric(prm.ur.gra[1,i])
delta1<-as.numeric(prm.ur.gra[2,i])
S01<-as.numeric(prm.ur.gra[3,i])
c<-as.numeric(prm.ur.gra[5,i])
tim<-data.N8$timeS[data.N8$ID == i]
data.ape<-data.N8$N8[data.N8$ID == i]
out.res<-ode(y=c(ln=0), times=tim, func = diff.ln, parms =c(tp4=prm.N8[1,i],c=c,tau=tau2,f=f1,delta=delta1,S0=S01), rtol = 1e-12)
res.ape<- data.ape-out.res[,2]
n1<-length(tim)
data.num<-data.N8n$N8_n[data.N8n$ID == i]
time<-data.N8n$timeIncl[data.N8n$ID == i]
n2<-length(time)
res.num<-data.num - naive_func(time,n04=prm.N8[2,i],dn4=prm.N8[3,i],tp4=prm.N8[1,i])
subj<-data.N8n$Pat[data.N8n$ID == i]
res.tot<-c(res.ape,res.num)
boot<-bootstrap2(res.tot,500,theta.res)
resu<-boot$thetastar
#### 95%CI ####
conf.level<-0.95
probs<-(1+c(-1,1)*conf.level)/2
print(as.character(subj[1]))
print("95%CI of tp4")
print(quantile(resu[1,],probs=probs)) # 95CI of tp4
print("95%CI of n0")
print(quantile(resu[2,],probs=probs)) # 95CI of n0
print("95%CI of dn")
print(quantile(resu[3,],probs=probs)) # 95CI of dn
print("95%CI of sd ape")
print(quantile(resu[4,],probs=probs)) # 95CI of sd_ape
print("95%CI of sd num")
print(quantile(resu[5,],probs=probs)) # 95CI of sd_num
print("")
print("")
}
#
###########################################################################################################
######################
##### Memory CD8 #####
######################
###########################################################################################################
prm.M8<-data.frame
#### labeling data ####
data.M8<-data_APE[!is.na(data_APE$M8),]
data.M8$M8<-ifelse(data.M8$M8<0,0,data.M8$M8)
####### cell numbers ############
prm.M8n<-data.frame
data.M8n<-data_cells[!is.na(data_cells$M8_n),]
## likelihood function : p1, p2, alpha, m04, dM8, sdlM8,sdM8
cost.M8 <- function(psi){
tim<-data.M8$timeS[data.M8$ID == i]
tau2<-data_Extra$tstop[data_Extra$ID==i]
f<-as.numeric(prm.ur.gra[1,i])
delta<-as.numeric(prm.ur.gra[2,i])
S0<-as.numeric(prm.ur.gra[3,i])
c<-as.numeric(prm.ur.gra[5,i])
out<-ode(y=c(lm1=0,lm2=0), times=tim, func = diff.lm.2comp, parms =c(p1=psi[1],p2=psi[2],c=c,tau=tau2,f=f,delta=delta,S0=S0), rtol = 1e-12)
M8_pred<-exp(psi[3])*out[,2]+(1-exp(psi[3]))*out[,3]
out1<-ifelse(M8_pred<0,0,asin(sqrt(M8_pred)))
out_cost<- ( data.fit - out1 )
nobs<-length(data.fit)
SSR.lM8 <- sum(out_cost^2)
Lik.lM8 <- ((2*pi*(exp(psi[6]))^2)^(-nobs/2))*exp(-SSR.lM8/(2*(exp(psi[6]))^2))
p_a<-exp(psi[3])*exp(psi[1])+(1-exp(psi[3]))*exp(psi[2])
tim_M8<-data.M8n$timeIncl[data.M8n$ID == i]
out.M8<-m_cells(tim_M8,m0=psi[4],pm=log(p_a),dm=psi[5])
out_cost2<- ( log10(data.fit2) - log10(out.M8) )
SSR.M8 <- sum(out_cost2^2)
nobs2<-length(data.fit2)
Lik.M8 <- ((2*pi*(exp(psi[7]))^2)^(-nobs2/2))*exp(-SSR.M8/(2*(exp(psi[7]))^2))
minlogl <- -log(Lik.lM8*Lik.M8)
return(minlogl)
}
for (i in seq(1,6,1)) {
data.fit<-asin(sqrt(data.M8$M8[data.M8$ID == i] ))
data.fit2<-data.M8n$M8_n[data.M8n$ID == i]
estim<-nlminb(c(-8,-4,-0.5,5,-3,0.02,5),cost.M8,upper=c(0,0,0,Inf,0,Inf,Inf),lower=c(-15,-15,-15,2,-15,-Inf,-Inf))
if (i==1) prm.M8<-estim$par
else prm.M8<-cbind(prm.M8,estim$par)
}
prm.M8
prm.M8<-rbind(prm.M8,exp(prm.M8[3,])*exp(prm.M8[1,])+(1-exp(prm.M8[3,]))*exp(prm.M8[2,]))
for (i in seq(1,6,1)) {
subj<-data.M8$Pat[data.M8$ID == i]
colnames(prm.M8)[i]<-as.character(subj[1]) }
rownames(prm.M8)<-c("p1","p2","alpha", "m04","dM8", "sdEr APE", "sdEr M","p_ave")
prm.M8
############# INDIVIDUAL PLOTS ########################
par(mfrow=c(2,3))
for (i in seq(1,6,1)){
tau2<-data_Extra$tstop[data_Extra$ID==i]
f<-as.numeric(prm.ur.gra[1,i])
delta<-as.numeric(prm.ur.gra[2,i])
S0<-as.numeric(prm.ur.gra[3,i])
c<-as.numeric(prm.ur.gra[5,i])
data.pred2<-data.M8$M8[data.M8$ID == i]
tim<-data.M8$timeS[data.M8$ID == i]
subj<-data.M8$Pat[data.M8$ID == i]
p1<-as.numeric(prm.M8[1,i])
p2<-as.numeric(prm.M8[2,i])
alpha<-as.numeric(prm.M8[3,i])
pred<-ode(y=c(lm1=0,lm2=0), tim=xfit, func = diff.lm.2comp, parms =c(p1=p1,p2=p2,c=c,tau=tau2,f=f,delta=delta,S0=S0), rtol = 1e-12)
yfit_m<-exp(alpha)*pred[,2]+(1-exp(alpha))*pred[,3]
plot(tim,data.pred2, main=paste0("Subject ",subj[1], "M8" ), xlab="time (days)", ylab="Percentage Labeled",xlim=c(0,350),ylim=c(0,0.05))
lines(spline(xfit,yfit_m),col="black")
}
par(mfrow=c(2,3))
for (i in seq(1,6,1)){
data.pred<-data.M8n$M8_n[data.M8n$ID == i]
tim<-data.M8n$timeIncl[data.M8n$ID == i]
subj<-data.M8n$Pat[data.M8n$ID == i]
pm<-as.numeric(prm.M8[8,i])
m04<-as.numeric(prm.M8[4,i])
dm<-as.numeric(prm.M8[5,i])
out1<-m_cells(xfit,m0=m04,pm=log(pm),dm=dm)
yfit<-out1
plot(tim,data.pred, main=paste0("Subject ",subj[1], "M8" ), xlab="time (days)", ylab="Cell Numbers/ml",xlim=c(0,350),ylim=c(0,600000))
lines(spline(xfit,yfit),col="black")
}
########################################################################################
prm.M8.tot<-rbind(exp(prm.M8[1:7,]),prm.M8[8,])
rownames(prm.M8.tot)<-rownames(prm.M8)
prm.M8.tot
########################################################################################
################ Confidence limits ###############################
res.ape<-data.frame
res.num<-data.frame
res.tot<-data.frame
boot<-data.frame
theta.res<-function(residual){
res1<-residual[1:n1] # for ape
res2<-residual[n1+1:n2] # for num
model.res<-function(psi){
data.fit<-asin(sqrt(data.M8$M8[data.M8$ID == i]+res1 ))
tim<-data.M8$timeS[data.M8$ID == i]
tau2<-data_Extra$tstop[data_Extra$ID==i]
f<-as.numeric(prm.ur.gra[1,i])
delta<-as.numeric(prm.ur.gra[2,i])
S0<-as.numeric(prm.ur.gra[3,i])
c<-as.numeric(prm.ur.gra[5,i])
out<-ode(y=c(lm1=0,lm2=0), times=tim, func = diff.lm.2comp, parms =c(p1=psi[1],p2=psi[2],c=c,tau=tau2,f=f,delta=delta,S0=S0), rtol = 1e-12)
M8_pred<-exp(psi[3])*out[,2]+(1-exp(psi[3]))*out[,3]
out2<-ifelse(M8_pred<0,0,asin(sqrt(M8_pred)))
out_cost<- ( data.fit - out2 )
nobs<-length(data.fit)
SSR.lM8 <- sum(out_cost^2)
Lik.lM8 <-((2*pi*(exp(psi[6]))^2)^(-nobs/2))*exp(-SSR.lM8/(2*(exp(psi[6]))^2))
p_a<-exp(psi[3])*exp(psi[1])+(1-exp(psi[3]))*exp(psi[2])
data.fit2<-data.M8n$M8_n[data.M8n$ID == i]
tim_M8<-data.M8n$timeIncl[data.M8n$ID == i]
out.M8<-m_cells(tim_M8,m0=psi[4],pm=log(p_a),dm=psi[5])
out_cost2<- ( log10(data.fit2+res2) - log10(out.M8) )
SSR.M8 <- sum(out_cost2^2)
nobs2<-length(data.fit2)
Lik.M8 <- ((2*pi*(exp(psi[7]))^2)^(-nobs2/2))*exp(-SSR.M8/(2*(exp(psi[7]))^2))
minlogl <- -log(Lik.lM8*Lik.M8)
return(minlogl)
}
estim<-nlminb(as.numeric(prm.M8[1:7,i]),model.res)#,upper=c(10,10,10),lower=c(0,0,0),method="Marq")
return(estim$par)
}
for (i in seq(1,6,1)) {
tau2<-data_Extra$tstop[data_Extra$ID==i]
f1<-as.numeric(prm.ur.gra[1,i])
delta1<-as.numeric(prm.ur.gra[2,i])
S01<-as.numeric(prm.ur.gra[3,i])
c<-as.numeric(prm.ur.gra[5,i])
p1<-as.numeric(prm.M8[1,i])
p2<-as.numeric(prm.M8[2,i])
alpha<-as.numeric(prm.M8[3,i])
tim<-data.M8$timeS[data.M8$ID == i]
data.ape<-data.M8$M8[data.M8$ID == i]
pred<-ode(y=c(lm1=0,lm2=0), tim=tim, func = diff.lm.2comp, parms =c(p1=p1,p2=p2,c=c,tau=tau2,f=f1,delta=delta1,S0=S01), rtol = 1e-12)
yfit_m<-exp(alpha)*pred[,2]+(1-exp(alpha))*pred[,3]
res.ape<- data.ape - yfit_m
n1<-length(tim)
data.num<-data.M8n$M8_n[data.M8n$ID == i]
time<-data.M8n$timeIncl[data.M8n$ID == i]
n2<-length(time)
pm<-as.numeric(prm.M8[8,i])
m04<-as.numeric(prm.M8[4,i])
dm<-as.numeric(prm.M8[5,i])
res.num<-data.num - m_cells(time,m0=m04,pm=log(pm),dm=dm)
subj<-data.M8n$Pat[data.M8n$ID == i]
res.tot<-c(res.ape,res.num)
# print(i)
# print(res.tot)
boot<-bootstrap2(res.tot,500,theta.res)
resu<-boot$thetastar
p_ave<-exp(resu[3,])*exp(resu[1,])+(1-exp(resu[3,]))*exp(resu[2,])
#### 95%CI ####
conf.level<-0.95
probs<-(1+c(-1,1)*conf.level)/2
print(as.character(subj[1]))
print("95%CI of p1")
print(quantile(resu[1,],probs=probs)) # 95CI of p1
print("95%CI of p2")
print(quantile(resu[2,],probs=probs)) # 95CI of p2
print("95%CI of alpha")
print(quantile(resu[3,],probs=probs)) # 95CI of alpha
print("95%CI of m0")
print(quantile(resu[4,],probs=probs)) # 95CI of m0
print("95%CI of dm")
print(quantile(resu[5,],probs=probs)) # 95CI of dm
print("95%CI of sd ape")
print(quantile(resu[6,],probs=probs)) # 95CI of sd ape
print("95%CI of sd num")
print(quantile(resu[7,],probs=probs)) # 95CI of sd num
print("95%CI of p_ave")
print(quantile(p_ave,probs=probs)) # 95CI of p_ave
print("")
print("")
}

## Sheet: R B cell subset  modeling 
Figure 4 and 7-source code and data 1 : B cell subset modeling
###########################################################################################################
######################
###### Naive B #####
######################
###########################################################################################################
prm.NB<-data.frame
#### labeling data ####
data.NB<-data_APE[!is.na(data_APE$NB),]
data.NB$NB<-ifelse(data.NB$NB<0,0,data.NB$NB)
####### cell numbers ############
prm.NBn<-data.frame
data.NBn<-data_cells[!is.na(data_cells$NB_n),]
cost.NB <- function(psi){
tim<-data.NB$timeS[data.NB$ID == i]
tau2<-data_Extra$tstop[data_Extra$ID==i]
f<-as.numeric(prm.ur.gra[1,i])
delta<-as.numeric(prm.ur.gra[2,i])
S0<-as.numeric(prm.ur.gra[3,i])
c<-as.numeric(prm.ur.gra[5,i])
out<-ode(y=c(lm1=0,lm2=0), times=tim, func = diff.lm.2comp, parms =c(p1=psi[1],p2=psi[2],c=c,tau=tau2,f=f,delta=delta,S0=S0), rtol = 1e-12)
NB_pred<-exp(psi[3])*out[,2]+(1-exp(psi[3]))*out[,3]
out1<-ifelse(NB_pred<0,0,asin(sqrt(NB_pred)))
out_cost<- ( data.fit - out1 )
nobs<-length(data.fit)
SSR.lNB <- sum(out_cost^2)
Lik.lNB <- ((2*pi*(exp(psi[6]))^2)^(-nobs/2))*exp(-SSR.lNB/(2*(exp(psi[6]))^2))
p_a<-exp(psi[3])*exp(psi[1])+(1-exp(psi[3]))*exp(psi[2])
tim_NB<-data.NBn$timeIncl[data.NBn$ID == i]
out.NB<-m_cells(tim_NB,m0=psi[4],pm=log(p_a),dm=psi[5])
out_cost2<- ( log10(data.fit2) - log10(out.NB) )
SSR.NB <- sum(out_cost2^2)
nobs2<-length(data.fit2)
Lik.NB <- ((2*pi*(exp(psi[7]))^2)^(-nobs2/2))*exp(-SSR.NB/(2*(exp(psi[7]))^2))
minlogl <- -log(Lik.lNB*Lik.NB)
return(minlogl)
}
for (i in seq(1,6,1)) {
data.fit<-asin(sqrt(data.NB$NB[data.NB$ID == i] ))
data.fit2<-data.NBn$NB_n[data.NBn$ID == i]
estim<-nlminb(c(-8,-4,-0.5,5,-3,0.02,5),cost.NB,upper=c(0,0,0,Inf,0,Inf,Inf),lower=c(-15,-15,-15,2,-15,-Inf,-Inf))
if (i==1) prm.NB<-estim$par
else prm.NB<-cbind(prm.NB,estim$par)
}
prm.NB
prm.NB<-rbind(prm.NB,exp(prm.NB[3,])*exp(prm.NB[1,])+(1-exp(prm.NB[3,]))*exp(prm.NB[2,]))
for (i in seq(1,6,1)) {
subj<-data.NB$Pat[data.NB$ID == i]
colnames(prm.NB)[i]<-as.character(subj[1]) }
rownames(prm.NB)<-c("p1","p2","alpha", "m0","dNB", "sdEr APE", "sdEr M","p_ave")
prm.NB
############# INDIVIDUAL PLOTS ########################
xfit<-seq(0,400,1)
par(mfrow=c(2,3))
for (i in seq(1,6,1)){
tau2<-data_Extra$tstop[data_Extra$ID==i]
f<-as.numeric(prm.ur.gra[1,i])
delta<-as.numeric(prm.ur.gra[2,i])
S0<-as.numeric(prm.ur.gra[3,i])
c<-as.numeric(prm.ur.gra[5,i])
data.pred2<-data.NB$NB[data.NB$ID == i]
tim<-data.NB$timeS[data.NB$ID == i]
subj<-data.NB$Pat[data.NB$ID == i]
p1<-as.numeric(prm.NB[1,i])
p2<-as.numeric(prm.NB[2,i])
alpha<-as.numeric(prm.NB[3,i])
pred<-ode(y=c(lm1=0,lm2=0), tim=xfit, func = diff.lm.2comp, parms =c(p1=p1,p2=p2,c=c,tau=tau2,f=f,delta=delta,S0=S0), rtol = 1e-12)
yfit_m<-exp(alpha)*pred[,2]+(1-exp(alpha))*pred[,3]
plot(tim,data.pred2, main=paste0("Subject ",subj[1], "NB" ), xlab="time (days)", ylab="Percentage Labeled",xlim=c(0,350),ylim=c(0,0.1))
lines(spline(xfit,yfit_m),col="black")
}
par(mfrow=c(2,3))
for (i in seq(1,6,1)){
data.pred<-data.NBn$NB_n[data.NBn$ID == i]
tim<-data.NBn$timeIncl[data.NBn$ID == i]
subj<-data.NBn$Pat[data.NBn$ID == i]
pm<-as.numeric(prm.NB[8,i])
m04<-as.numeric(prm.NB[4,i])
dm<-as.numeric(prm.NB[5,i])
out1<-m_cells(xfit,m0=m04,pm=log(pm),dm=dm)
yfit<-out1
plot(tim,data.pred, main=paste0("Subject ",subj[1], "NB" ), xlab="time (days)", ylab="Cell Numbers/ml",xlim=c(0,350),ylim=c(0,10**6))
lines(spline(xfit,yfit),col="black")
}
########################################################################################
prm.NB.tot<-rbind(exp(prm.NB[1:7,]),prm.NB[8,])
rownames(prm.NB.tot)<-rownames(prm.NB)
prm.NB.tot
########################################################################################
################ Confidence limits ###############################
res.ape<-data.frame
res.num<-data.frame
res.tot<-data.frame
boot<-data.frame
theta.res<-function(residual){
res1<-residual[1:n1] # for ape
res2<-residual[n1+1:n2] # for num
model.res<-function(psi){
data.fit<-asin(sqrt(data.NB$NB[data.NB$ID == i]+res1 ))
tim<-data.NB$timeS[data.NB$ID == i]
tau2<-data_Extra$tstop[data_Extra$ID==i]
f<-as.numeric(prm.ur.gra[1,i])
delta<-as.numeric(prm.ur.gra[2,i])
S0<-as.numeric(prm.ur.gra[3,i])
c<-as.numeric(prm.ur.gra[5,i])
out<-ode(y=c(lm1=0,lm2=0), times=tim, func = diff.lm.2comp, parms =c(p1=psi[1],p2=psi[2],c=c,tau=tau2,f=f,delta=delta,S0=S0), rtol = 1e-12)
NB_pred<-exp(psi[3])*out[,2]+(1-exp(psi[3]))*out[,3]
out2<-ifelse(NB_pred<0,0,asin(sqrt(NB_pred)))
out_cost<- ( data.fit - out2 )
nobs<-length(data.fit)
SSR.lNB <- sum(out_cost^2)
Lik.lNB <-((2*pi*(exp(psi[6]))^2)^(-nobs/2))*exp(-SSR.lNB/(2*(exp(psi[6]))^2))
p_a<-exp(psi[3])*exp(psi[1])+(1-exp(psi[3]))*exp(psi[2])
data.fit2<-data.NBn$NB_n[data.NBn$ID == i]
tim_NB<-data.NBn$timeIncl[data.NBn$ID == i]
out.NB<-m_cells(tim_NB,m0=psi[4],pm=log(p_a),dm=psi[5])
out_cost2<- ( log10(data.fit2+res2) - log10(out.NB) )
SSR.NB <- sum(out_cost2^2)
nobs2<-length(data.fit2)
Lik.NB <- ((2*pi*(exp(psi[7]))^2)^(-nobs2/2))*exp(-SSR.NB/(2*(exp(psi[7]))^2))
minlogl <- -log(Lik.lNB*Lik.NB)
return(minlogl)
}
estim<-nlminb(as.numeric(prm.NB[1:7,i]),model.res)#,upper=c(10,10,10),lower=c(0,0,0),method="Marq")
return(estim$par)
}
for (i in seq(1,6,1)) {
tau2<-data_Extra$tstop[data_Extra$ID==i]
f1<-as.numeric(prm.ur.gra[1,i])
delta1<-as.numeric(prm.ur.gra[2,i])
S01<-as.numeric(prm.ur.gra[3,i])
c<-as.numeric(prm.ur.gra[5,i])
p1<-as.numeric(prm.NB[1,i])
p2<-as.numeric(prm.NB[2,i])
alpha<-as.numeric(prm.NB[3,i])
tim<-data.NB$timeS[data.NB$ID == i]
data.ape<-data.NB$NB[data.NB$ID == i]
pred<-ode(y=c(lm1=0,lm2=0), tim=tim, func = diff.lm.2comp, parms =c(p1=p1,p2=p2,c=c,tau=tau2,f=f1,delta=delta1,S0=S01), rtol = 1e-12)
yfit_m<-exp(alpha)*pred[,2]+(1-exp(alpha))*pred[,3]
res.ape<- data.ape - yfit_m
n1<-length(tim)
data.num<-data.NBn$NB_n[data.NBn$ID == i]
time<-data.NBn$timeIncl[data.NBn$ID == i]
n2<-length(time)
pm<-as.numeric(prm.NB[8,i])
m04<-as.numeric(prm.NB[4,i])
dm<-as.numeric(prm.NB[5,i])
res.num<-data.num - m_cells(time,m0=m04,pm=log(pm),dm=dm)
subj<-data.NBn$Pat[data.NBn$ID == i]
res.tot<-c(res.ape,res.num)
# print(i)
# print(res.tot)
boot<-bootstrap2(res.tot,500,theta.res)
resu<-boot$thetastar
p_ave<-exp(resu[3,])*exp(resu[1,])+(1-exp(resu[3,]))*exp(resu[2,])
#### 95%CI ####
conf.level<-0.95
probs<-(1+c(-1,1)*conf.level)/2
print(as.character(subj[1]))
print("95%CI of p1")
print(quantile(resu[1,],probs=probs)) # 95CI of p1
print("95%CI of p2")
print(quantile(resu[2,],probs=probs)) # 95CI of p2
print("95%CI of alpha")
print(quantile(resu[3,],probs=probs)) # 95CI of alpha
print("95%CI of m0")
print(quantile(resu[4,],probs=probs)) # 95CI of m0
print("95%CI of dm")
print(quantile(resu[5,],probs=probs)) # 95CI of dm
print("95%CI of sd ape")
print(quantile(resu[6,],probs=probs)) # 95CI of sd ape
print("95%CI of sd num")
print(quantile(resu[7,],probs=probs)) # 95CI of sd num
print("95%CI of p_ave")
print(quantile(p_ave,probs=probs)) # 95CI of p_ave
print("")
print("")
}
###########################################################################################################
######################
###### Memory B ######
######################
###########################################################################################################
prm.MB<-data.frame
#### labeling data ####
data.MB<-data_APE[!is.na(data_APE$MB),]
data.MB$MB<-ifelse(data.MB$MB<0,0,data.MB$MB)
#### cell numbers ####
prm.MBn<-data.frame
data.MBn<-data_cells[!is.na(data_cells$MB_n),]
## likelihood function : p1, p2, alpha, m04, dMB, sdlMB,sdMB
cost.MB <- function(psi){
tim<-data.MB$timeS[data.MB$ID == i]
tau2<-data_Extra$tstop[data_Extra$ID==i]
f<-as.numeric(prm.ur.gra[1,i])
delta<-as.numeric(prm.ur.gra[2,i])
S0<-as.numeric(prm.ur.gra[3,i])
c<-as.numeric(prm.ur.gra[5,i])
out<-ode(y=c(lm1=0,lm2=0), times=tim, func = diff.lm.2comp, parms =c(p1=psi[1],p2=psi[2],c=c,tau=tau2,f=f,delta=delta,S0=S0), rtol = 1e-12)
MB_pred<-exp(psi[3])*out[,2]+(1-exp(psi[3]))*out[,3]
out1<-ifelse(MB_pred<0,0,asin(sqrt(MB_pred)))
out_cost<- ( data.fit - out1 )
nobs<-length(data.fit)
SSR.lMB <- sum(out_cost^2)
Lik.lMB <- ((2*pi*(exp(psi[6]))^2)^(-nobs/2))*exp(-SSR.lMB/(2*(exp(psi[6]))^2))
p_a<-exp(psi[3])*exp(psi[1])+(1-exp(psi[3]))*exp(psi[2])
tim_MB<-data.MBn$timeIncl[data.MBn$ID == i]
out.MB<-m_cells(tim_MB,m0=psi[4],pm=log(p_a),dm=psi[5])
out_cost2<- ( log10(data.fit2) - log10(out.MB) )
SSR.MB <- sum(out_cost2^2)
nobs2<-length(data.fit2)
Lik.MB <- ((2*pi*(exp(psi[7]))^2)^(-nobs2/2))*exp(-SSR.MB/(2*(exp(psi[7]))^2))
minlogl <- -log(Lik.lMB*Lik.MB)
return(minlogl)
}
for (i in seq(1,6,1)) {
data.fit<-asin(sqrt(data.MB$MB[data.MB$ID == i] ))
data.fit2<-data.MBn$MB_n[data.MBn$ID == i]
estim<-nlminb(c(-8,-4,-0.5,5,-3,0.02,5),cost.MB,upper=c(0,0,0,Inf,0,Inf,Inf),lower=c(-15,-15,-15,2,-15,-Inf,-Inf))
if (i==1) prm.MB<-estim$par
else prm.MB<-cbind(prm.MB,estim$par)
}
prm.MB
prm.MB<-rbind(prm.MB,exp(prm.MB[3,])*exp(prm.MB[1,])+(1-exp(prm.MB[3,]))*exp(prm.MB[2,]))
for (i in seq(1,6,1)) {
subj<-data.MB$Pat[data.MB$ID == i]
colnames(prm.MB)[i]<-as.character(subj[1]) }
rownames(prm.MB)<-c("p1","p2","alpha", "m0","dMB", "sdEr APE", "sdEr M","p_ave")
prm.MB
############# INDIVIDUAL PLOTS ########################
yfit_pred<-matrix(nrow=401,ncol=6)
par(mfrow=c(2,3))
for (i in seq(1,6,1)){
tau2<-data_Extra$tstop[data_Extra$ID==i]
f<-as.numeric(prm.ur.gra[1,i])
delta<-as.numeric(prm.ur.gra[2,i])
S0<-as.numeric(prm.ur.gra[3,i])
c<-as.numeric(prm.ur.gra[5,i])
data.pred2<-data.MB$MB[data.MB$ID == i]
tim<-data.MB$timeS[data.MB$ID == i]
subj<-data.MB$Pat[data.MB$ID == i]
p1<-as.numeric(prm.MB[1,i])
p2<-as.numeric(prm.MB[2,i])
alpha<-as.numeric(prm.MB[3,i])
pred<-ode(y=c(lm1=0,lm2=0), tim=xfit, func = diff.lm.2comp, parms =c(p1=p1,p2=p2,c=c,tau=tau2,f=f,delta=delta,S0=S0), rtol = 1e-12)
yfit_m<-exp(alpha)*pred[,2]+(1-exp(alpha))*pred[,3]
plot(tim,data.pred2, main=paste0("Subject ",subj[1], "MB" ), xlab="time (days)", ylab="Percentage Labeled",xlim=c(0,350),ylim=c(0,0.1))
lines(spline(xfit,yfit_m),col="black")
}
par(mfrow=c(2,3))
for (i in seq(1,6,1)){
data.pred<-data.MBn$MB_n[data.MBn$ID == i]
tim<-data.MBn$timeIncl[data.MBn$ID == i]
subj<-data.MBn$Pat[data.MBn$ID == i]
pm<-as.numeric(prm.MB[8,i])
m04<-as.numeric(prm.MB[4,i])
dm<-as.numeric(prm.MB[5,i])
out1<-m_cells(xfit,m0=m04,pm=log(pm),dm=dm)
yfit<-out1
plot(tim,data.pred, main=paste0("Subject ",subj[1], "MB" ), xlab="time (days)", ylab="Cell Numbers/ml",xlim=c(0,350),ylim=c(0,60000))
lines(spline(xfit,yfit),col="black")
}
########################################################################################
prm.MB.tot<-rbind(exp(prm.MB[1:7,]),prm.MB[8,])
rownames(prm.MB.tot)<-rownames(prm.MB)
prm.MB.tot
########################################################################################
################ Confidence limits ###############################
res.ape<-data.frame
res.num<-data.frame
res.tot<-data.frame
boot<-data.frame
theta.res<-function(residual){
res1<-residual[1:n1] # for ape
res2<-residual[n1+1:n2] # for num
model.res<-function(psi){
data.fit<-asin(sqrt(data.MB$MB[data.MB$ID == i]+res1 ))
tim<-data.MB$timeS[data.MB$ID == i]
tau2<-data_Extra$tstop[data_Extra$ID==i]
f<-as.numeric(prm.ur.gra[1,i])
delta<-as.numeric(prm.ur.gra[2,i])
S0<-as.numeric(prm.ur.gra[3,i])
c<-as.numeric(prm.ur.gra[5,i])
out<-ode(y=c(lm1=0,lm2=0), times=tim, func = diff.lm.2comp, parms =c(p1=psi[1],p2=psi[2],c=c,tau=tau2,f=f,delta=delta,S0=S0), rtol = 1e-12)
MB_pred<-exp(psi[3])*out[,2]+(1-exp(psi[3]))*out[,3]
out2<-ifelse(MB_pred<0,0,asin(sqrt(MB_pred)))
out_cost<- ( data.fit - out2 )
nobs<-length(data.fit)
SSR.lMB <- sum(out_cost^2)
Lik.lMB <-((2*pi*(exp(psi[6]))^2)^(-nobs/2))*exp(-SSR.lMB/(2*(exp(psi[6]))^2))
p_a<-exp(psi[3])*exp(psi[1])+(1-exp(psi[3]))*exp(psi[2])
data.fit2<-data.MBn$MB_n[data.MBn$ID == i]
tim_MB<-data.MBn$timeIncl[data.MBn$ID == i]
out.MB<-m_cells(tim_MB,m0=psi[4],pm=log(p_a),dm=psi[5])
out_cost2<- ( log10(data.fit2+res2) - log10(out.MB) )
SSR.MB <- sum(out_cost2^2)
nobs2<-length(data.fit2)
Lik.MB <- ((2*pi*(exp(psi[7]))^2)^(-nobs2/2))*exp(-SSR.MB/(2*(exp(psi[7]))^2))
minlogl <- -log(Lik.lMB*Lik.MB)
return(minlogl)
}
estim<-nlminb(as.numeric(prm.MB[1:7,i]),model.res)#,upper=c(10,10,10),lower=c(0,0,0),method="Marq")
return(estim$par)
}
for (i in seq(1,6,1)) {
tau2<-data_Extra$tstop[data_Extra$ID==i]
f1<-as.numeric(prm.ur.gra[1,i])
delta1<-as.numeric(prm.ur.gra[2,i])
S01<-as.numeric(prm.ur.gra[3,i])
c<-as.numeric(prm.ur.gra[5,i])
p1<-as.numeric(prm.MB[1,i])
p2<-as.numeric(prm.MB[2,i])
alpha<-as.numeric(prm.MB[3,i])
tim<-data.MB$timeS[data.MB$ID == i]
data.ape<-data.MB$MB[data.MB$ID == i]
pred<-ode(y=c(lm1=0,lm2=0), tim=tim, func = diff.lm.2comp, parms =c(p1=p1,p2=p2,c=c,tau=tau2,f=f1,delta=delta1,S0=S01), rtol = 1e-12)
yfit_m<-exp(alpha)*pred[,2]+(1-exp(alpha))*pred[,3]
res.ape<- data.ape - yfit_m
n1<-length(tim)
data.num<-data.MBn$MB_n[data.MBn$ID == i]
time<-data.MBn$timeIncl[data.MBn$ID == i]
n2<-length(time)
pm<-as.numeric(prm.MB[8,i])
m04<-as.numeric(prm.MB[4,i])
dm<-as.numeric(prm.MB[5,i])
res.num<-data.num - m_cells(time,m0=m04,pm=log(pm),dm=dm)
subj<-data.MBn$Pat[data.MBn$ID == i]
res.tot<-c(res.ape,res.num)
# print(i)
# print(res.tot)
boot<-bootstrap2(res.tot,500,theta.res)
resu<-boot$thetastar
p_ave<-exp(resu[3,])*exp(resu[1,])+(1-exp(resu[3,]))*exp(resu[2,])
#### 95%CI ####
conf.level<-0.95
probs<-(1+c(-1,1)*conf.level)/2
print(as.character(subj[1]))
print("95%CI of p1")
print(quantile(resu[1,],probs=probs)) # 95CI of p1
print("95%CI of p2")
print(quantile(resu[2,],probs=probs)) # 95CI of p2
print("95%CI of alpha")
print(quantile(resu[3,],probs=probs)) # 95CI of alpha
print("95%CI of m0")
print(quantile(resu[4,],probs=probs)) # 95CI of m0
print("95%CI of dm")
print(quantile(resu[5,],probs=probs)) # 95CI of dm
print("95%CI of sd ape")
print(quantile(resu[6,],probs=probs)) # 95CI of sd ape
print("95%CI of sd num")
print(quantile(resu[7,],probs=probs)) # 95CI of sd num
print("95%CI of p_ave")
print(quantile(p_ave,probs=probs)) # 95CI of p_ave
print("")
print("")
}
###########################################################################################################
####################################
##### Natural Effector B cells #####
####################################
###########################################################################################################
prm.NE<-data.frame
#### labeling data ####
data.NE<-data_APE[!is.na(data_APE$NE),]
data.NE$NE<-ifelse(data.NE$NE<0,0,data.NE$NE)
####### cell numbers ############
data.NEn<-data_cells[!is.na(data_cells$NE_n),]
#
cost.NE <- function(psi){
tim<-data.NE$timeS[data.NE$ID == i]
tau2<-data_Extra$tstop[data_Extra$ID==i]
f<-as.numeric(prm.ur.gra[1,i])
delta<-as.numeric(prm.ur.gra[2,i])
S0<-as.numeric(prm.ur.gra[3,i])
c<-as.numeric(prm.ur.gra[5,i])
out<-ode(y=c(lm1=0,lm2=0), times=tim, func = diff.lm.2comp, parms =c(p1=psi[1],p2=psi[2],c=c,tau=tau2,f=f,delta=delta,S0=S0), rtol = 1e-12)
NE_pred<-exp(psi[3])*out[,2]+(1-exp(psi[3]))*out[,3]
out1<-ifelse(NE_pred<0,0,asin(sqrt(NE_pred)))
out_cost<- ( data.fit - out1 )
nobs<-length(data.fit)
SSR.lNE <- sum(out_cost^2)
Lik.lNE <- ((2*pi*(exp(psi[6]))^2)^(-nobs/2))*exp(-SSR.lNE/(2*(exp(psi[6]))^2))
p_a<-exp(psi[3])*exp(psi[1])+(1-exp(psi[3]))*exp(psi[2])
tim_NE<-data.NEn$timeIncl[data.NEn$ID == i]
out.NE<-m_cells(tim_NE,m0=psi[4],pm=log(p_a),dm=psi[5])
out_cost2<- ( log10(data.fit2) - log10(out.NE) )
SSR.NE <- sum(out_cost2^2)
nobs2<-length(data.fit2)
Lik.NE <- ((2*pi*(exp(psi[7]))^2)^(-nobs2/2))*exp(-SSR.NE/(2*(exp(psi[7]))^2))
minlogl <- -log(Lik.lNE*Lik.NE)
return(minlogl)
}
#library(marqLevAlg)
for (i in seq(2,6,1)) {
data.fit<-asin(sqrt(data.NE$NE[data.NE$ID == i]))
data.fit2<-data.NEn$NE_n[data.NEn$ID == i]
estim<-nlminb(c(-5,-4,-0.5,3,-5,0.2,5),cost.NE,upper=c(0,0,0,Inf,0,Inf,Inf),lower=c(-15,-15,-15,2,-15,-Inf,-Inf))
if (i==2) prm.NE<-estim$par
else prm.NE<-cbind(prm.NE,estim$par)
}
prm.NE
prm.NE<-rbind(prm.NE,exp(prm.NE[3,])*exp(prm.NE[1,])+(1-exp(prm.NE[3,]))*exp(prm.NE[2,]))
for (i in seq(2,6,1)) {
subj<-data.NE$Pat[data.NE$ID == i]
colnames(prm.NE)[i-1]<-as.character(subj[1]) }
rownames(prm.NE)<-c("p1","p2","alpha", "m04","dNE", "sdEr APE", "sdEr M","p_ave")
prm.NE
############# INDIVIDUAL PLOTS ########################
xfit<-seq(0,400,1)
par(mfrow=c(2,3))
for (i in seq(2,6,1)){
tau2<-data_Extra$tstop[data_Extra$ID==i]
f<-as.numeric(prm.ur.gra[1,i])
delta<-as.numeric(prm.ur.gra[2,i])
S0<-as.numeric(prm.ur.gra[3,i])
c<-as.numeric(prm.ur.gra[5,i])
data.pred2<-data.NE$NE[data.NE$ID == i]
tim<-data.NE$timeS[data.NE$ID == i]
subj<-data.NE$Pat[data.NE$ID == i]
p1<-as.numeric(prm.NE[1,i-1])
p2<-as.numeric(prm.NE[2,i-1])
alpha<-as.numeric(prm.NE[3,i-1])
pred<-ode(y=c(lm1=0,lm2=0), tim=xfit, func = diff.lm.2comp, parms =c(p1=p1,p2=p2,c=c,tau=tau2,f=f,delta=delta,S0=S0), rtol = 1e-12)
yfit_m<-exp(alpha)*pred[,2]+(1-exp(alpha))*pred[,3]
plot(tim,data.pred2, main=paste0("Subject ",subj[1], "NE" ), xlab="time (days)", ylab="Percentage Labeled",xlim=c(0,350),ylim=c(0,0.06))
lines(spline(xfit,yfit_m),col="black")
}
par(mfrow=c(2,3))
for (i in seq(2,6,1)){
data.pred<-data.NEn$NE_n[data.NEn$ID == i]
tim<-data.NEn$timeIncl[data.NEn$ID == i]
subj<-data.NEn$Pat[data.NEn$ID == i]
pm<-as.numeric(prm.NE[8,i-1])
m04<-as.numeric(prm.NE[4,i-1])
dm<-as.numeric(prm.NE[5,i-1])
out1<-m_cells(xfit,m0=m04,pm=log(pm),dm=dm)
yfit<-out1
plot(tim,data.pred, main=paste0("Subject ",subj[1], "NE" ), xlab="time (days)", ylab="Cell Numbers/ml",xlim=c(0,350),ylim=c(0,16000))
lines(spline(xfit,yfit),col="black")
}
########################################################################################
prm.NE.tot<-rbind(exp(prm.NE[1:7,]),prm.NE[8,])
rownames(prm.NE.tot)<-rownames(prm.NE)
prm.NE.tot
########################################################################################
################ Confidence limits ###############################
res.ape<-data.frame
res.num<-data.frame
res.tot<-data.frame
boot<-data.frame
theta.res<-function(residual){
n1<-length(data.NE$timeS[data.NE$ID == i] )
n2<-length(data.NEn$timeIncl[data.NEn$ID == i] )
res1<-residual[1:n1] # for ape
res2<-residual[n1+1:n2] # for num
model.res<-function(psi){
tau2<-data_Extra$tstop[data_Extra$ID==i]
f<-as.numeric(prm.ur.gra[1,i])
delta<-as.numeric(prm.ur.gra[2,i])
S0<-as.numeric(prm.ur.gra[3,i])
c<-as.numeric(prm.ur.gra[5,i])
#### APE ####
data.fit<-asin(sqrt(data.NE$NE[data.NE$ID == i]+res1 ))
tim<-data.NE$timeS[data.NE$ID == i]
out<-ode(y=c(lm1=0,lm2=0), times=tim, func = diff.lm.2comp, parms =c(p1=psi[1],p2=psi[2],c=c,tau=tau2,f=f,delta=delta,S0=S0), rtol = 1e-12)
NE_pred<-exp(psi[3])*out[,2]+(1-exp(psi[3]))*out[,3]
out2<-ifelse(NE_pred<0,0,asin(sqrt(NE_pred)))
out_cost<- ( data.fit - out2 )
nobs<-length(data.fit)
SSR.lNE <- sum(out_cost^2)
Lik.lNE <-((2*pi*(exp(psi[6]))^2)^(-nobs/2))*exp(-SSR.lNE/(2*(exp(psi[6]))^2))
#### Cell Numbers ####
p_a<-exp(psi[3])*exp(psi[1])+(1-exp(psi[3]))*exp(psi[2])
data.fit2<-data.NEn$NE_n[data.NEn$ID == i]
tim_NE<-data.NEn$timeIncl[data.NEn$ID == i]
out.NE<-m_cells(tim_NE,m0=psi[4],pm=log(p_a),dm=psi[5])
out_cost2<- ( log10(data.fit2+res2) - log10(out.NE) )
SSR.NE <- sum(out_cost2^2)
nobs2<-length(data.fit2)
Lik.NE <- ((2*pi*(exp(psi[7]))^2)^(-nobs2/2))*exp(-SSR.NE/(2*(exp(psi[7]))^2))
#### Tot Likelihood ####
minlogl <- -log(Lik.lNE*Lik.NE)
return(minlogl)
}
estim<-nlminb(c(-2,-2,-0.2,8,-5,2,5),model.res,upper=c(0,0,0,Inf,0,Inf,Inf),lower=c(-15,-15,-15,2,-15,-Inf,-Inf))
return(estim$par)
}
for (i in seq(5,6,1)) {
tau2<-data_Extra$tstop[data_Extra$ID==i]
f1<-as.numeric(prm.ur.gra[1,i])
delta1<-as.numeric(prm.ur.gra[2,i])
S01<-as.numeric(prm.ur.gra[3,i])
c<-as.numeric(prm.ur.gra[5,i])
p1<-as.numeric(prm.NE[1,i-1])
p2<-as.numeric(prm.NE[2,i-1])
alpha<-as.numeric(prm.NE[3,i-1])
tim<-data.NE$timeS[data.NE$ID == i]
data.ape<-data.NE$NE[data.NE$ID == i]
pred<-ode(y=c(lm1=0,lm2=0), tim=tim, func = diff.lm.2comp, parms =c(p1=p1,p2=p2,c=c,tau=tau2,f=f1,delta=delta1,S0=S01), rtol = 1e-12)
yfit_m<-exp(alpha)*pred[,2]+(1-exp(alpha))*pred[,3]
res.ape<- data.ape - yfit_m
n1<-length(tim)
data.num<-data.NEn$NE_n[data.NEn$ID == i]
time<-data.NEn$timeIncl[data.NEn$ID == i]
n2<-length(time)
pm<-as.numeric(prm.NE[8,i-1])
m04<-as.numeric(prm.NE[4,i-1])
dm<-as.numeric(prm.NE[5,i-1])
res.num<-data.num - m_cells(time,m0=m04,pm=log(pm),dm=dm)
subj<-data.NEn$Pat[data.NEn$ID == i]
res.tot<-c(res.ape,res.num)
# print(i)
# print(res.tot)
boot<-bootstrap2(res.tot,500,theta.res)
resu<-boot$thetastar
p_ave<-exp(resu[3,])*exp(resu[1,])+(1-exp(resu[3,]))*exp(resu[2,])
#### 95%CI ####
conf.level<-0.95
probs<-(1+c(-1,1)*conf.level)/2
print(as.character(subj[1]))
print("95%CI of p1")
print(quantile(resu[1,],probs=probs)) # 95CI of p1
print("95%CI of p2")
print(quantile(resu[2,],probs=probs)) # 95CI of p2
print("95%CI of alpha")
print(quantile(resu[3,],probs=probs)) # 95CI of alpha
print("95%CI of m0")
print(quantile(resu[4,],probs=probs)) # 95CI of m0
print("95%CI of dm")
print(quantile(resu[5,],probs=probs)) # 95CI of dm
print("95%CI of sd ape")
print(quantile(resu[6,],probs=probs)) # 95CI of sd ape
print("95%CI of sd num")
print(quantile(resu[7,],probs=probs)) # 95CI of sd num
print("95%CI of p_ave")
print(quantile(p_ave,probs=probs)) # 95CI of p_ave
print("")
print("")
}
