# Supplementary material for: Cell-density independent increased lymphocyte production and loss rates post-autologous HSCT
Source: eLife journal article supplement (doi:10.7554/elife.59775), 2021-02-03
Supplement: supp [file elife-59775-supp-v1.zip › elife_poa_e59775_Figure_6_source_data_1.xls]

## Sheet: controls
Figure 6-source data 1: Blood values cell numbers and percentages of healthy controls.
number per ml	total	naïve	(non IgM+)CD27+	IgM+CD27+
subset	B	BN	BMG	BMM
control 1	210000	108331	22227	25831
control 2	200000	116559	32904	20961
control 3	210000	106452	16323	39071
control 4	140000	85388	8714	11620
control 5	250000	111479	17795	19508
control 6	340000	169554	14475	10773
control 7	390000	196328	17867	13701
control 8	240000	13113	38915	12001
control 9	89000	179108	47340	62817
control 10	210000	107248	26121	36903
control 11
control 12
control 13
control 14
control 15
control 16
control 17
control 18
control 19
control 20
control 21
control 22
control 23
control 24
control 25
control 26
control 27
Median	210000	109905	20235	20047
Lower 95% confidence limit	140000	85388	11620	14475
Upper 95% confidence limit	340000	179108	39071	38915
percentages
		BN	BMG	BMM
control 1		71.1	17.6	11.3
control 2		67.7	15	17.3
control 3		63.5	10.7	25.9
control 4		80	8.9	11.1
control 5		79.9	9.7	10.5
control 6		86.8	7.3	5.9
control 7		62.9	15.5	21.6
control 8		86.8	7.3	5.9
control 9		19.1	61.5	19.4
control 10		64.2	14.1	21.7
Median		69.4	14.3	12.4

## Sheet: participants
Figure 6-source data 1: Blood values of B cell numbers and percetages of participants
Pat	ID in paper
E02	A
E01	B
L01	C
L03	D
L04	E
L02	F
Pat	ID	Time after start treatment	naïve B	memory B (non IgM+) CD27+	memory B IgM+ CD27+
L01	1	275	133745	10542.5	5581.32
L01	1	287	112237	10168.5	4796.46
L01	1	301	87125.4	8535.39
L01	1	315	118764	6171.7
L01	1	329	91580.1	7179.62
L01	1	343	140644	2011.59
L01	1	354	85552.6	7021.91
L01	1	399	107089	4892.4
L01	1	441	124871	11997.1
L01	1	504	76301.1	22548.7
L02	2	399	234090	8100	4320
L02	2	427	369572	4955.15	10323.2
L02	2	440	335242	8186.15	8965.79
L02	2	462	312285	5563.27	7417.7
L02	2	476	240307	3380.64	5070.96
L02	2	490	177205	7178.87	10957.2
L02	2	508	275792	1820.41	10922.5
L02	2	557	146781	4310.06	5507.3
L02	2	652	109271	6959.93	8119.92
L03	3	355	592116	11172	3990
L03	3	368	579042	2070.47	6354
L03	3	378
L03	3	395	334370	4561.66	1411.64
L03	3	404	624687	7927.5	2418.61
L03	3	425	515466	3502.6	1823.51
L03	3	445	471026	3713.05	1656.35
L03	3	487	375579	4277.66	1403.8
L03	3	564	267303	5602.16	2900.16
E01	4	225	267910	3835.71	6196.15
E01	4	245
E01	4	260	148497	5983.41	2719.73
E01	4	274	158039	5357.27	2455.42
E01	4	288	210871	3265.1	2448.83
E01	4	301	288059	3229.36	5812.85
E01	4	316	271990	4689.49	5359.42
E02	5	183	791504	22689.2	6108.63
E02	5	196	598812	22518	10008
E02	5	209	254738	16069.9	4761.46
E02	5	224	262607	9193.25	3597.36
E02	5	236	423732	18732	7105.26
E02	5	244	349760	16125.7	5560.57
E02	5	264	264670	20131.5	7697.33
E02	5	286	445758	21958.5	9515.36
E02	5	322	298963	23680.2	5180.05
E02	5	464	433916	37318.2	13171.1
E02	5	593	271265	41505	15564.4
L04	6	378	1.13446e+06	27157.9	11110
L04	6	414
L04	6	442	627491	28702.3	10887.1
L04	6	456	399121	33434.2	11493
L04	6	476	537300	31359.9	12544
L04	6	491	516913	23741.3	8633.2
L04	6	505	609370	35202.6	12138.8
L04	6	562	426771	31612.7	10161.2
L04	6	682	443886	34270.6	15503.4
L04	6	756	435078	32307.8	11846.2
