# Supplementary material for: Cell-density independent increased lymphocyte production and loss rates post-autologous HSCT
Source: eLife journal article supplement (doi:10.7554/elife.59775), 2021-02-03
Supplement: supp [file elife-59775-supp-v1.zip › elife_poa_e59775_Figure_7_figure_supplement_1.pdf]

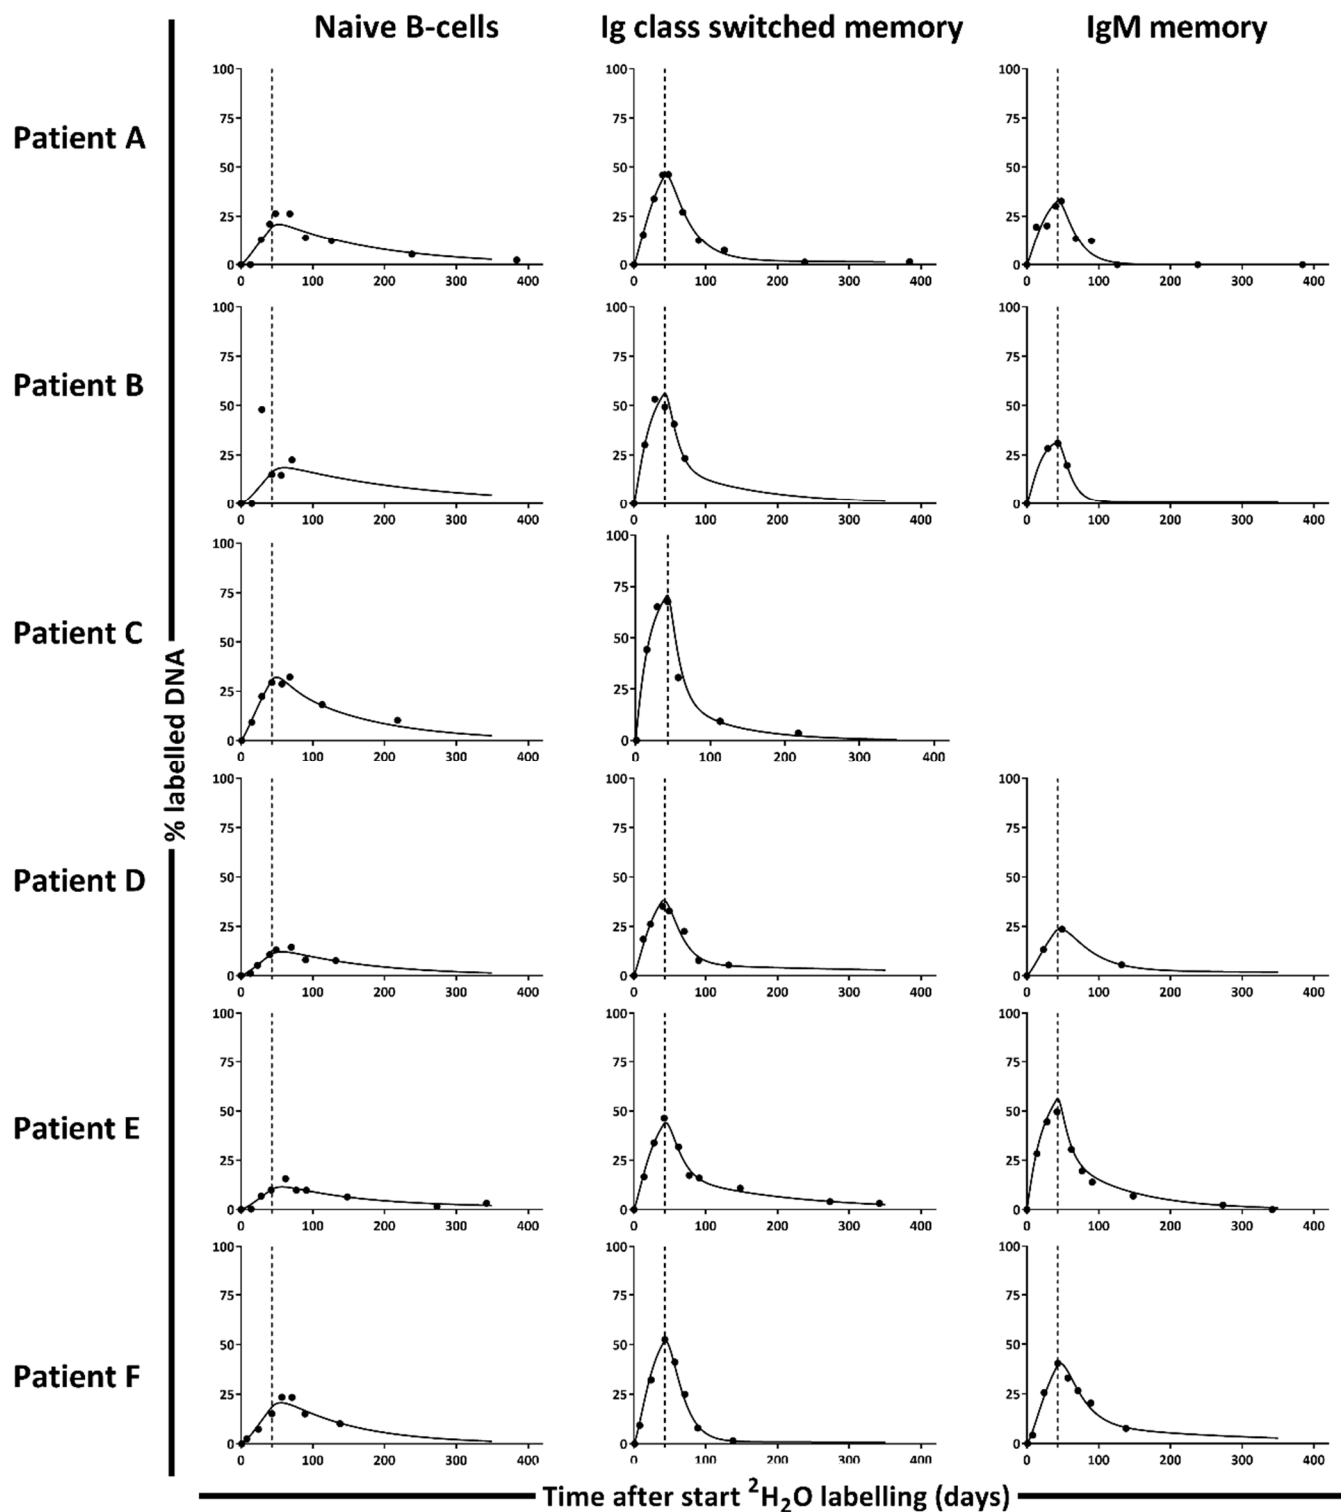

**Figure 7-figure supplement 1. Best fits of  $^2\text{H}$  enrichment in B-cell subsets in autoHSCT patients.** Best fits of the model (see material and methods) to the enrichment data in naive, Ig class-switched memory and IgM<sup>+</sup> memory B-cells in the 6 autoHSCT patients (A to F). Measured enrichments are shown by black dots. Label enrichment in the DNA was scaled between 0 and 100% by normalizing for the maximum enrichment in granulocytes (see material and methods). The end of  $^2\text{H}_2\text{O}$  administration is marked by a dashed vertical line. Best fits of  $^2\text{H}$  enrichment of the corresponding subsets in healthy individuals were previously published by Westera *et al.* 2015 <sup>24</sup>.
