# Supplementary material for: Cell-density independent increased lymphocyte production and loss rates post-autologous HSCT
Source: eLife journal article supplement (doi:10.7554/elife.59775), 2021-02-03
Supplement: supp [file elife-59775-supp-v1.zip › elife_poa_e59775_Figure_7_source_data_1.xlsx]

## Sheet: Blad1
	Figure 7-source data 1. Average daily production rates for B cell subsets for autoHSCT patients.
		Average production rate per day
		(95% confidence limits)
	Patient	Naive	Ig class-switched memory
		B-cells	B-cells	B-cells
	A	0.0058	0.0214	0.019
		(0.0053-0.0085)	(0.0201-0.0233)	(0.0192-0.1353)
	B	0.0051	0.0651	0.0369
		(0.0050-0.0341)	(0.0438-0.1492)	(0.0183-0.0486)
	C	0.0154	0.1375	n.a.
		(0.0140-0.0260)	(0.0983-0.2747)
	D	0.0038	0.0302	0.0108
		(0.0032-0.0047)	(0.0252-0.0393)	(0.0107-0.0183)
	E	0.0034	0.0338	0.0867
		(0.0030-0.0047)	(0.0294-0.0428)	(0.0681-0.1353)
	F	0.0066	0.0395	0.0213
		(0.0056-0.0078)	(0.0369-0.0430)	(0.0164-0.0344)
